# Supplementary material for: TP53 Mutation as a Prognostic and Predictive Marker in Sarcoma: Pooled Analysis of MOSCATO and ProfiLER Precision Medicine Trials
Source: MDPI journal article supplement (doi:10.3390/cancers13133362), 2021-07-05
Supplement: s1 [file s1]

# Supplementary Materials: *TP53* Mutation as a Prognostic and Predictive Marker in Sarcoma: Pooled Analysis of MOSCATO and ProFiLER Precision Medicine Trials

Elise F. Nassif; Edouard Auclin; Rastilav Bahleda; Charles Honoré; Olivier Mir; Sarah Dumont; Benoite Mery; Khalil Hodroj; Mehdi Brahmi; Olivier Trédan; Isabelle Ray-Coquard; Jean-Yves Blay; Christophe Massard; Axel Le Cesne ; Armelle Dufresne

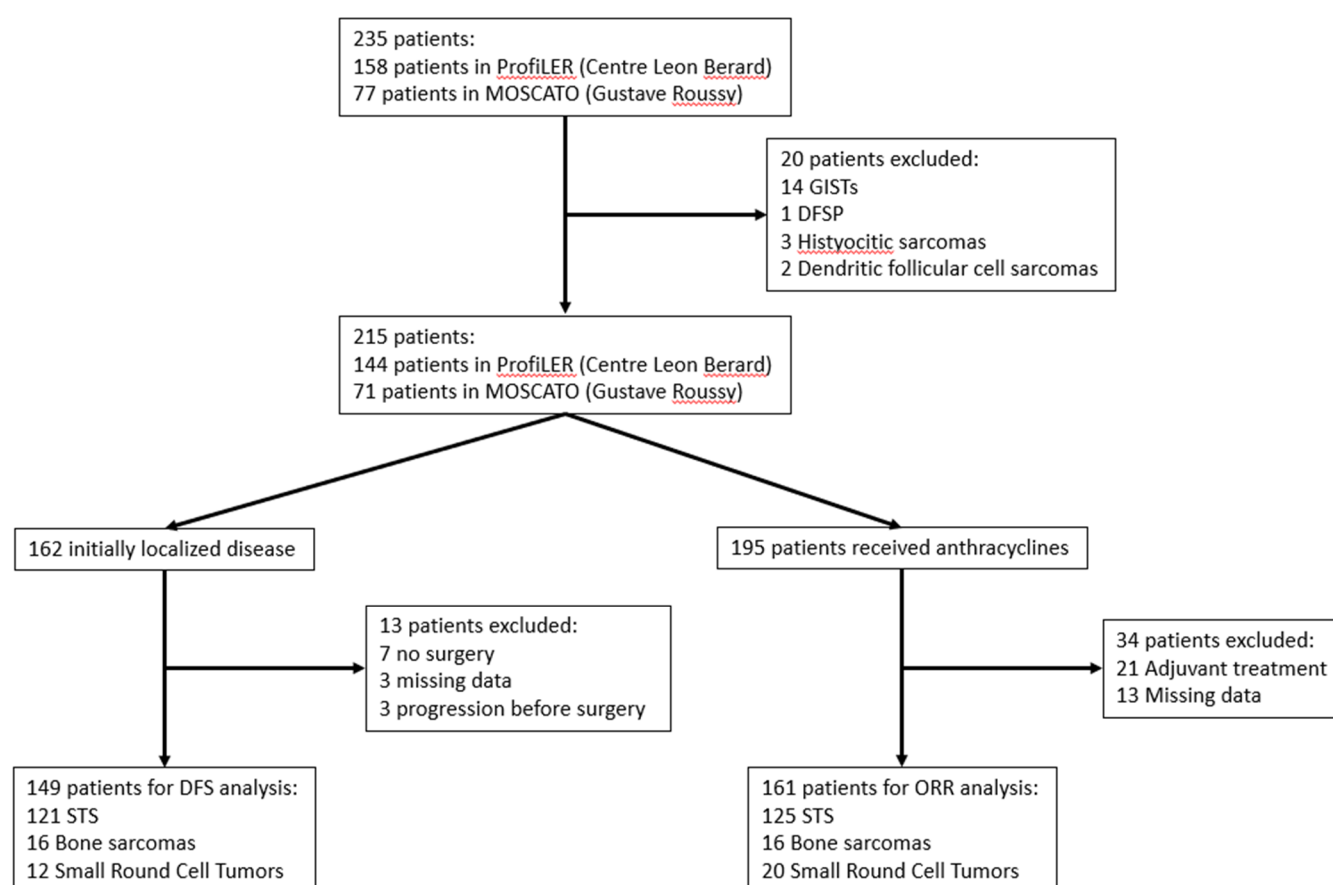

**Figure S1.** Flow chart of selection of patients for Disease-free survival (DFS) analysis and Objective Response Rate (ORR).

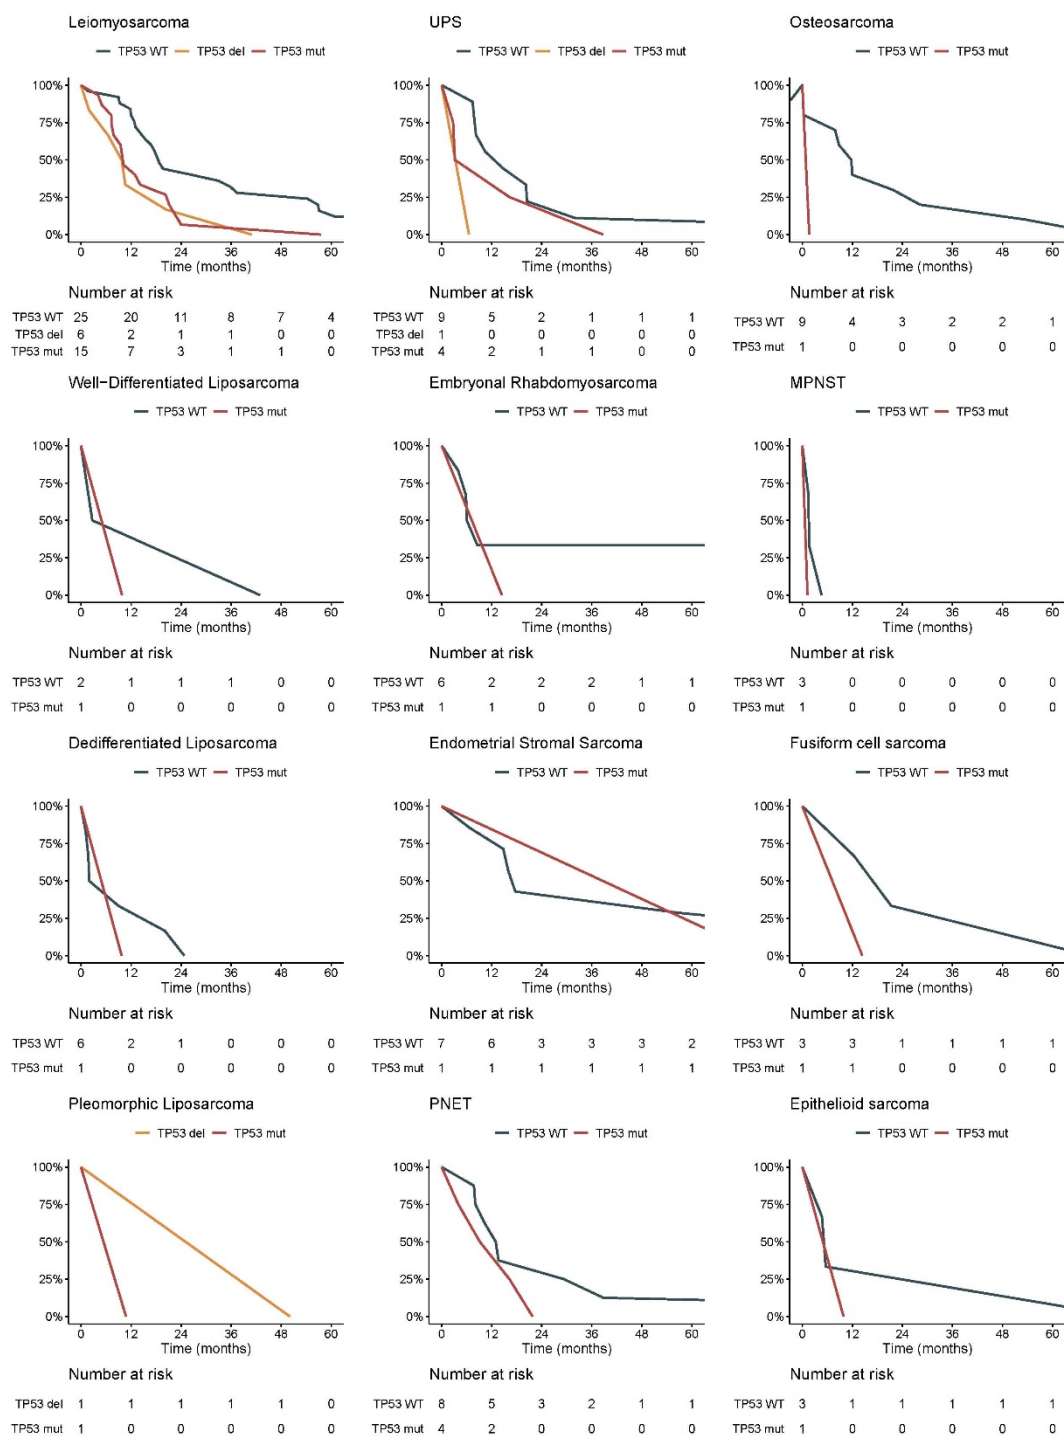

Figure S2. Disease-free survival (DFS) according to TP53 status by histotype in MOSCATO and ProFiLER cohorts.

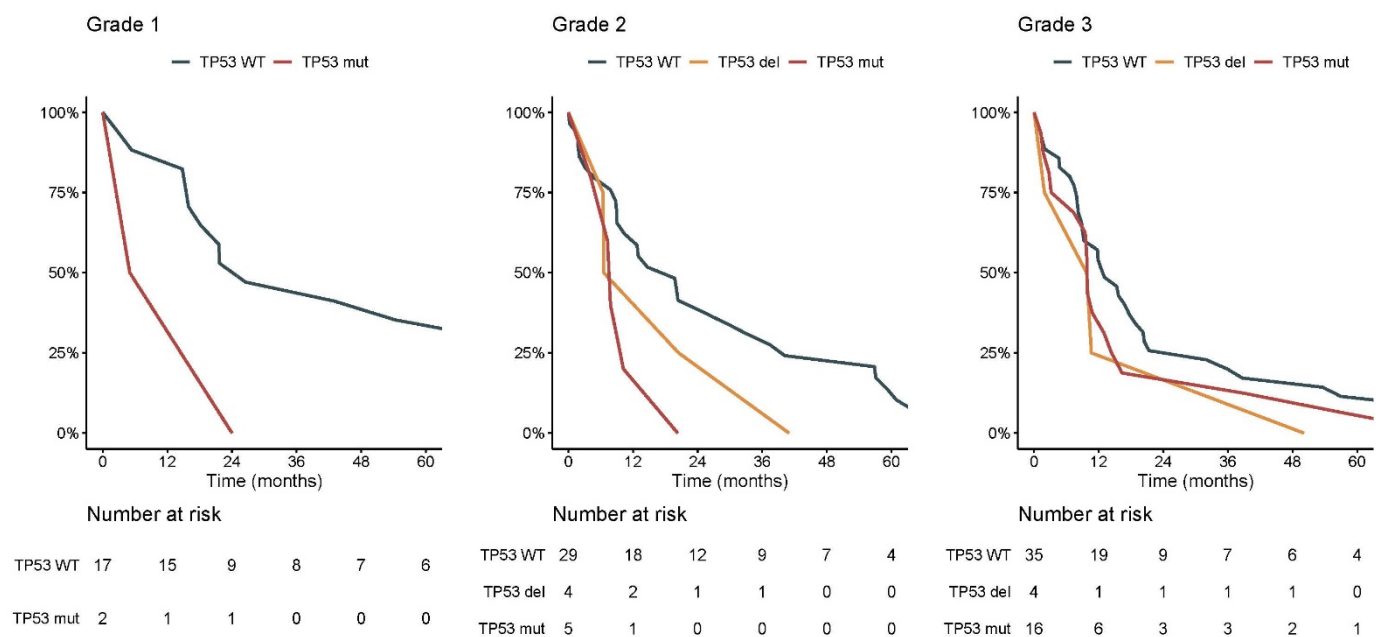

**Figure S3.** Disease-free survival (DFS) according to TP53 status by FNCLCC Grade in MOSCATO and ProFiLER cohorts.

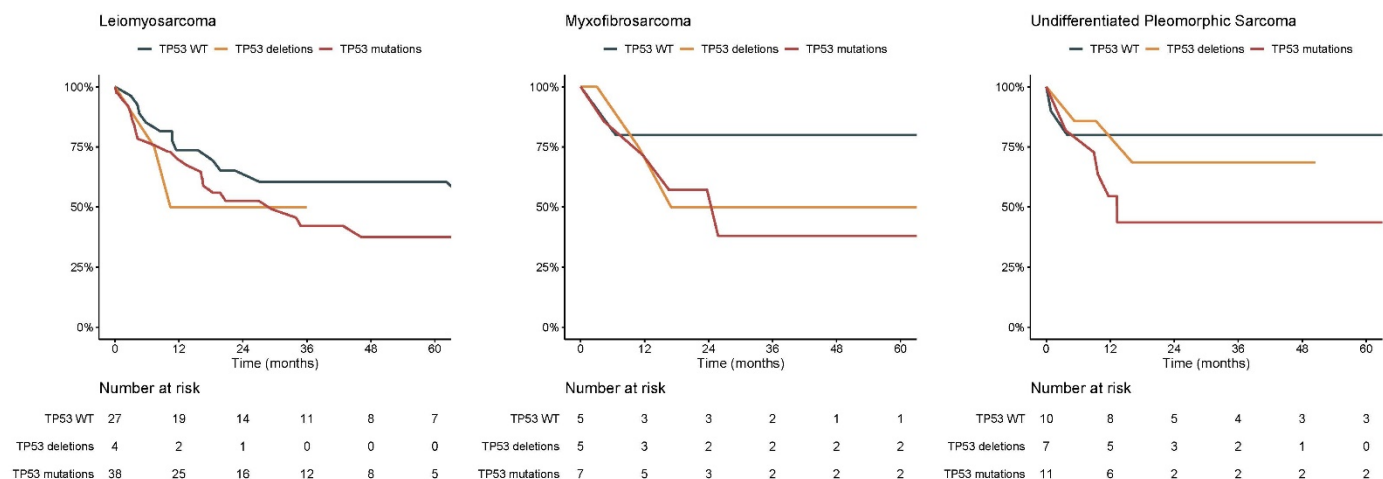

**Figure S4.** Disease-free survival (DFS) according to TP53 status by histotype in TCGA cohort.

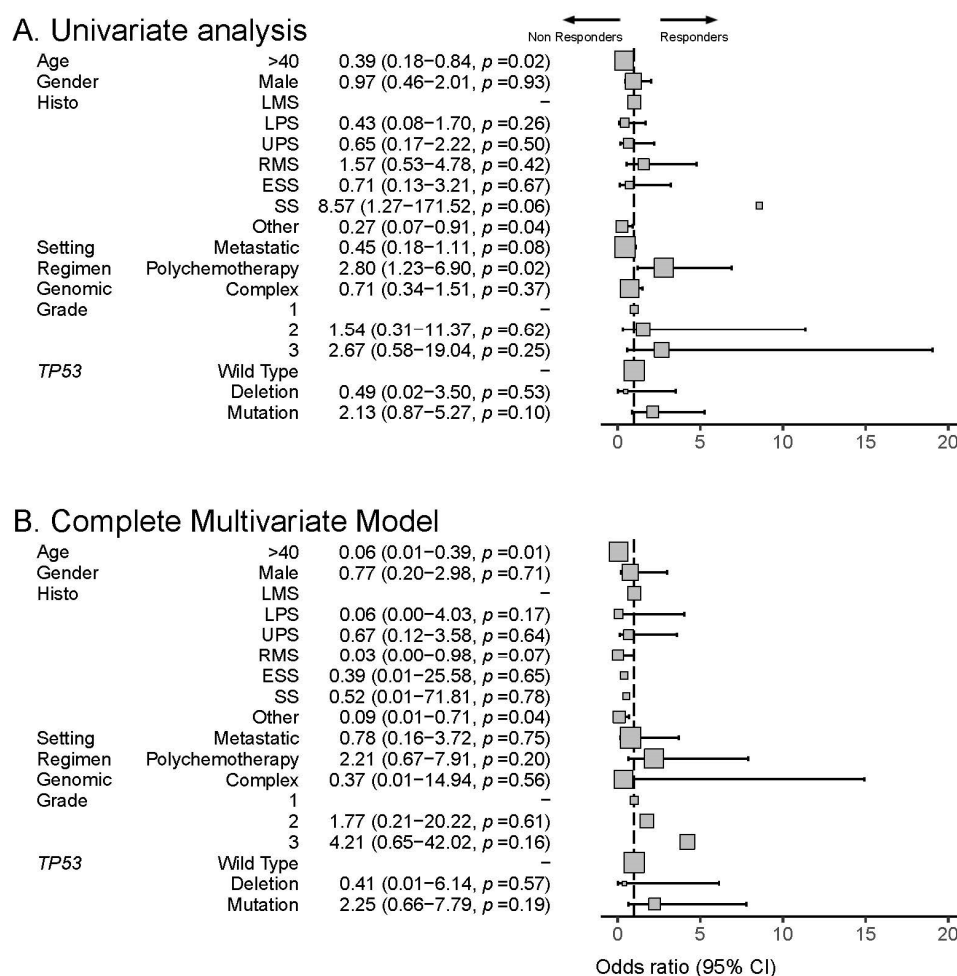

**Figure S5.** Predictive response to anthracyclines in STS: Factors associated with Objective Response Rate to anthracyclines in MOSCATO and ProfILER ( $n = 125$ ) in binomial logistic regression. **(A):** Forest plot of Odds ratio (OR), in univariate analysis; **(B):** Forest plot of OR in complete multivariate model. ESS = Endometrial Stromal Sarcoma; LMS = Leiomyosarcoma; LPS = Liposarcoma; OR = Odds Ratio; RMS = Rhabdomyosarcoma; UPS = Undifferentiated Pleomorphic sarcoma; SS = Synovial Sarcoma; 95% CI = 95% Confidence Interval, Complete model included: Age, Gender, Histotype, Setting of prescription (Metastatic versus Neoadjuvant), Regimen (Combination therapy or monotherapy), Genomic (Complex versus Simple) and TP53 alterations.

**A. MOSCATO**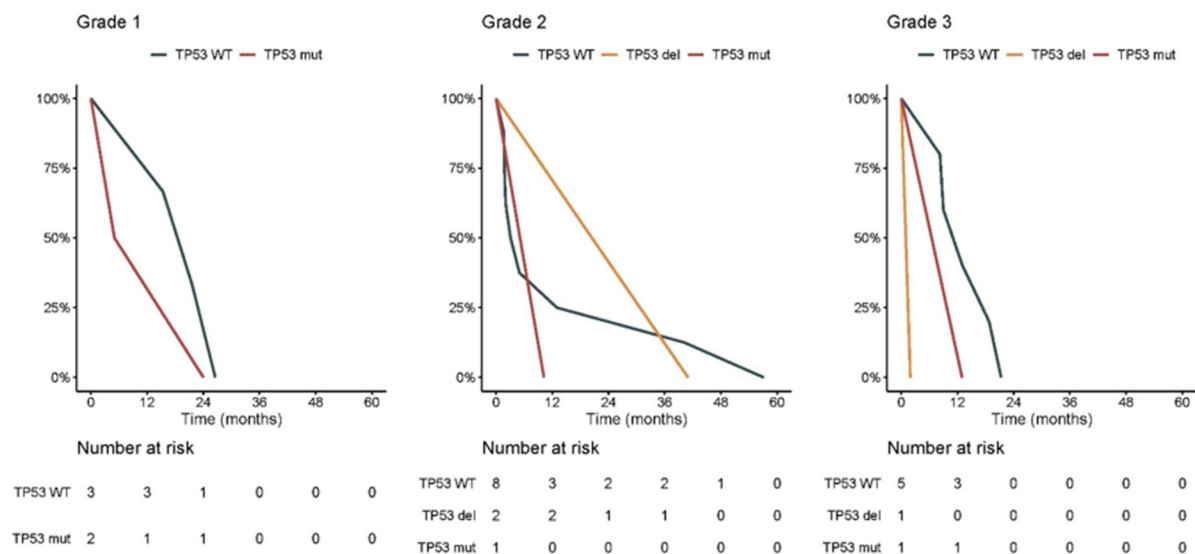**B. ProfILER**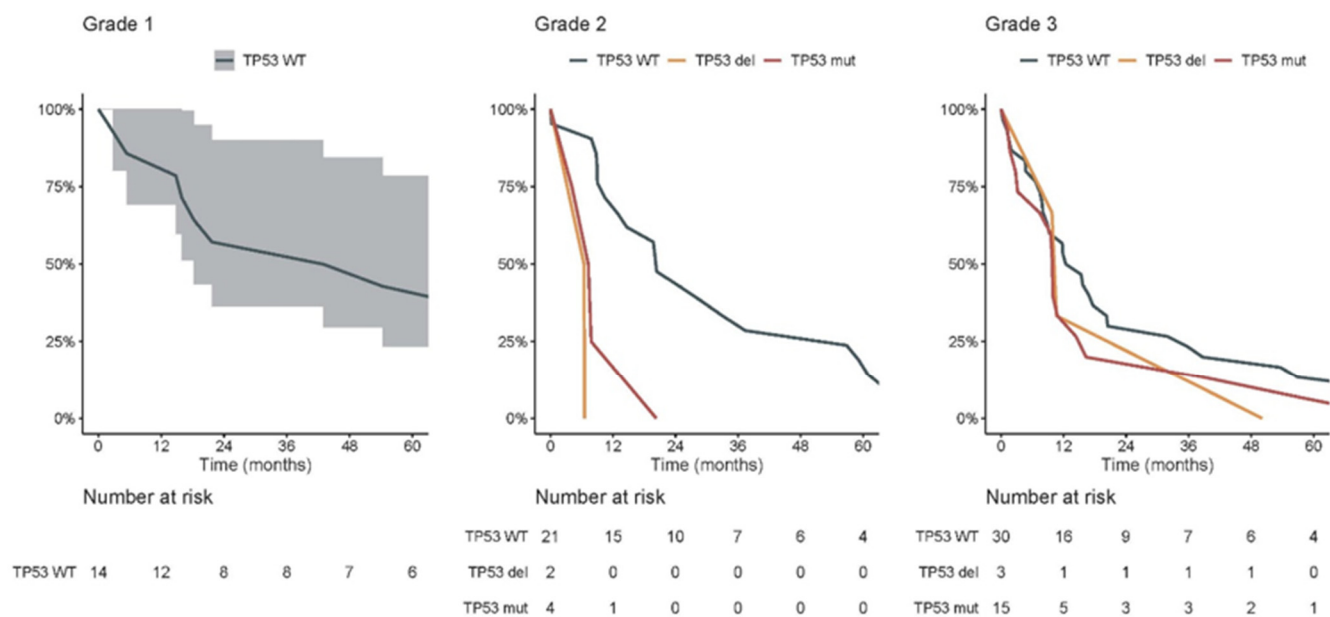

**Figure M1.** DFS by grade and TP53 status in MOSCATO and ProfILER cohorts. **(A)**: MOSCATO, **(B)**: ProfILER.

| Gene   | RefSeq       | target exons                            | Gene   | RefSeq                                  | target exons          | Gene    | RefSeq       | target exons                |
|--------|--------------|-----------------------------------------|--------|-----------------------------------------|-----------------------|---------|--------------|-----------------------------|
| ABL1   | NM_007313.2  | 4 to 7                                  | FLT1   | NM_002019.4                             | 1 to 30               | NFE2L2  | NM_006164.3  | 2                           |
| AKT1   | NM_005163.2  | 3;6                                     | FLT3   | NM_004119.2                             | 11;14;16;20           | NOTCH1  | NM_017617.3  | 24;27;34                    |
| AKT2   | NM_001626.3  | 3                                       | GNAQ   | NM_002067.2                             | 5                     | NOTCH2  | NM_024408.   | 34                          |
| AKT3   | NM_005465.3  | 3                                       | GNAQ   | NM_002072.3                             | 5;8                   | NOTCH4  | NM_004557.3  | 1 to 30                     |
| ALK    | NM_004304.3  | 20 to 26                                | GNAS   | NM_000516.4                             | 8;9                   | NPM1    | NM_002520.6  | 12                          |
| APC    | NM_000038.5  | 16 (partial)                            | HNF1A  | NM_000545.5                             | 3;4                   | NRAS    | NM_002524.3  | 2 to 4                      |
| ATM    | NM_00005.3   | 8;9;12;17;26;34 to 36;39;50;54;59;61;63 | HRAS   | NM_005343.2                             | 2 to 4                | PDGFRA  | NM_006206.4  | 12;14;15;18                 |
| BRAF   | NM_004333.4  | 11;15                                   | IDH1   | NM_005896.2                             | 4                     | PIK3CA  | NM_006218.2  | 2;5;7;8;10;14;19;21         |
| BRCA1  | NM_007294.3  | 2 to 23                                 | IDH2   | NM_002168.2                             | 4                     | PIK3R1  | NM_0181523.1 | 10;12;14;15                 |
| BRCA2  | NM_000059.3  | 2 to 27                                 | INPP4B | NM_003866.2                             | 5 to 27               | PPP2R1A | NM_014225.5  | 5;6                         |
| CDH1   | NM_004360.2  | 3;8;9                                   | JAK2   | NM_004972.3                             | 14                    | PTEN    | NM_000314.4  | 1 to 9                      |
| CDKN2A | NM_00077.4   | 2                                       | JAK3   | NM_000215.3                             | 4;13;16               | PTPN11  | NM_002834.3  | 3;13                        |
| CSF1R  | NM_005211.3  | 7;22                                    | KDR    | NM_002253.2                             | 1 to 30               | RB1     | NM_000321.2  | 4;6;10;11;14;17;18;20 to 22 |
| CTNNB1 | NM_NM        | 3                                       | KEAP1  | NM_003500.1                             | 2 to 6                | RET     | NM_020975.4  | 10;11;13;15;16              |
| DDR2   | NM_001014796 | 4 to 19                                 | KIT    | NM_000222.2                             | 2;9 to 11;13;15;17;18 | ROS1    | NM_002944.   | 38                          |
| EGFR   | NM_005228.3  | 3;7;12;15;18 to 21                      | KRAS   | NM_003360.2                             | 2 to 4                | SMAD4   | NM_005359.5  | 3 to 6;8 to 12              |
| ERBB2  | NM_004448.2  | 8;19 to 21                              | MAP2K1 | NM_002755.3                             | 2;3                   | SMARCB1 | NM_003073.2  | 2;4;5;9                     |
| ERBB3  | NM_001982.3  | 1 to 28                                 | MAP2K4 | NM_003010.2                             | 1 to 11               | SMO     | NM_005631.4  | 3;5;6;9;11                  |
| ERBB4  | NM_005235.2  | 3 to 9;15;23                            | MAP3K1 | NM_005921.1                             | 1 to 20               | SRC     | NM_005417.3  | 14                          |
| EZH2   | NM_004456.4  | 16                                      | MET    | NM_001127500.2 (partial);11;14;16 to 19 |                       | STK11   | NM_000455.4  | 1 to 9                      |
| FBXW7  | NM_033632.2  | 2 to 12                                 | MLL3   | NM_002493.3                             | 12                    | TP53    | NM_000546.4  | 1 to 11                     |
| FGFR1  | NM_023110.2  | 4;7;12;14;15                            | MLL3   | NM_170606.2                             | 8;9;43                | TP53    | NM_000546.4  | 2;4 to 8;10                 |
| FGFR2  | NM_000141.4  | 7;9;12;14                               | MPL    | NM_005373.2                             | 1                     | TSC1    | NM_000368.4  | 1 to 23                     |
| FGFR3  | NM_000142.4  | 7;9;14;16;18                            | MTOR   | NM_004958.3                             | 1 to 58               | TSC2    | NM_000548.3  | 2 to 42                     |
| FGFR4  | NM_002011.3  | 2 to 18                                 | NF1    | NM_001042492                            | 1 to 58               | VHL     | NM_000551.3  | 1 to 3                      |

### Supplementary methods: panel targeted Next Generation Sequencing MOSCATO

| Gene   | RefSeq       | Exons    | Gene   | RefSeq       | Exons        | Gene    | RefSeq       | Exons   |
|--------|--------------|----------|--------|--------------|--------------|---------|--------------|---------|
| ABL1   | NM_007313    | 1 to 11  | FGFR3  | NM_000142    | 2 to 19      | PTCH1   | NM_001083603 | 1 to 28 |
| AKT1   | NM_005163    | 4        | FGFR4  | NM_002011    | 2 to 18      | PTEN    | NM_000314    | 1 to 9  |
| AKT2   | NM_001626    | 2 to 14  | GNAQ   | NM_002072    | 5            | RB1     | NM_000321    | 1 to 27 |
| ALK    | NM_004304    | 1 to 29  | HRAS   | NM_005343    | 2 to 4       | RET     | NM_020975    | 1 to 20 |
| APC    | NM_001127511 | 1 to 15  | IGF1R  | NM_000875    | 1 to 4       | ROR1    | NM_005012    | 1 to 9  |
| AXL    | NM_021913    | 1 to 20  | JAK2   | NM_004972    | 1 to 25      | ROR2    | NM_004560    | 1 to 9  |
| BRAF   | NM_004333    | 15       | JAK3   | NM_000215    | 2 to 24      | ROS1    | NM_002944    | 1 to 43 |
| BRCA1  | NM_007294    | 2 to 24  | KDR    | NM_002253    | 1 to 30      | RYK     | NM_002958    | 1 to 15 |
| BRCA2  | NM_000059    | 2 to 27  | KIT    | NM_000222    | 1 to 21      | SDHAF2  | NM_017841    | 1 to 43 |
| RAF1   | NM_002880    | 1 to 17  | KRAS   | NM_004985    | 2 et 3 (+ 4) | SDHB    | NM_003000    | 1 to 8  |
| CDKN2A | NM_000077    | 1 to 3   | MERTK  | NM_006343    | 1 to 19      | SDHC    | NM_001035511 | 1 to 5  |
| CSF1   | NM_172212    | 1 to 9   | MET    | NM_001127500 | 2 to 21      | SDHD    | NM_003002    | 1 to 43 |
| CSF1R  | NM_005211    | 2 to 22  | MPL    | NM_005373    | 1 to 12      | SMARCB1 | NM_003073    | 1 to 9  |
| DDB2   | NM_000107    | 1 to 10  | MST1R  | NM_001244937 | 1 to 19      | SMO     | NM_005631    | 1 to 12 |
| DDR1   | NM_001202523 | 3 to 21  | MTOR   | NM_004958    | 1 to 58      | SRC     | NM_005417    | 4 to 14 |
| DDR2   | NM_006182    | 4 to 19  | MUSK   | NM_001166280 | 1 to 16      | STK11   | NM_000455    | 1 to 10 |
| EGFR   | NM_005228    | 19 to 21 | NRAS   | NM_002524    | 2 to 4       | TEK     | NM_000459    | 1 to 23 |
| ERBB2  | NM_004448    | 1 to 27  | PDGFA  | NM_033023    | 1 to 17      | TIE1    | NM_005424    | 1 to 23 |
| FLT1   | NM_002019    | 1 to 32  | PDGFB  | NM_002608    | 1 to 8       | TP53    | NM_000546    | 2 to 12 |
| FLT3   | NM_004119    | 1 to 24  | PDGFRA | NM_006206    | 2 to 23      | TSC1    | NM_001162427 | 3 to 23 |
| FLT4   | NM_182925    | 1 to 30  | PDGFRB | NM_002609    | 2 to 23      | TSC2    | NM_000548    | 2 to 42 |
| FGFR1  | NM_023106    | 4 to 21  | PIK3CA | NM_006218    | 10 et 21     | TYRO3   | NM_006293    | 1 to 10 |
| FGFR2  | NM_000141    | 2 to 27  | PIK3R1 | NM_181523    | 2 to 16      | VHL     | NM_000551    | 1 to 9  |

Genes added in Panel V2 (October 2014)

### Supplementary methods: panel targeted Next Generation Sequencing ProfILER

**Figure M2.** Panels of Targeted Next Generation Sequencing used in MOSCATO and ProfILER trials.

**Table S1.** Characteristics of the cohort.

|                  | Overall<br><i>n</i> = 215 | Initial Diagnosis                 |                           |                       |
|------------------|---------------------------|-----------------------------------|---------------------------|-----------------------|
|                  |                           | Localized Disease, <i>n</i> = 162 | Metastatic, <i>n</i> = 51 | Unknown, <i>n</i> = 2 |
| Age at diagnosis |                           |                                   |                           |                       |
| ≤40              | 94 (44%)                  | 61 (38%)                          | 32 (63%)                  | 1 (50%)               |

|                                       |           |           |          |          |
|---------------------------------------|-----------|-----------|----------|----------|
| >40                                   | 121 (56%) | 101 (62%) | 19 (37%) | 1 (50%)  |
| <b>Gender</b>                         |           |           |          |          |
| Female                                | 112 (52%) | 88 (54%)  | 23 (45%) | 1 (50%)  |
| Male                                  | 103 (48%) | 74 (46%)  | 28 (55%) | 1 (50%)  |
| <b>Grade</b>                          |           |           |          |          |
| 1                                     | 24 (17%)  | 22 (18%)  | 2 (8.7%) | -        |
| 2                                     | 48 (33%)  | 40 (33%)  | 8 (35%)  | -        |
| 3                                     | 72 (50%)  | 58 (48%)  | 13 (57%) | 1 (100%) |
| Missing or not applicable             | 71        | 42        | 28       | 1        |
| <b>Genomic profile</b>                |           |           |          |          |
| Simple                                | 80 (37%)  | 53 (33%)  | 26 (51%) | -        |
| Complex                               | 135 (63%) | 109 (67%) | 25 (49%) | 1 (50%)  |
| <b>Histotype</b>                      |           |           |          |          |
| Leiomyosarcoma                        | 53 (25%)  | 46 (28%)  | 7 (14%)  | -        |
| Well-Differentiated Liposarcoma       | 4 (1.9%)  | 3 (1.9%)  | 1 (2.0%) | -        |
| Dedifferentiated Liposarcoma          | 7 (3.3%)  | 7 (4.3%)  | -        | -        |
| Myxoid Round Cell Liposarcoma         | 4 (1.9%)  | 3 (1.9%)  | 1 (2.0%) | -        |
| Pleomorphic Liposarcoma               | 2 (0.9%)  | 2 (1.2%)  | -        | -        |
| Undifferentiated Pleomorphic Sarcoma  | 20 (9.3%) | 16 (9.9%) | 4 (7.8%) | -        |
| Alveolar Rhabdomyosarcoma             | 13 (6.0%) | 6 (3.7%)  | 7 (14%)  | -        |
| Embryonal Rhabdomyosarcoma            | 11 (5.1%) | 8 (4.9%)  | 3 (5.9%) | -        |
| Pleomorphic Rhabdomyosarcoma          | 3 (1.4%)  | 2 (1.2%)  | 1 (2.0%) | -        |
| Endometrial Stromal Sarcoma           | 10 (4.7%) | 9 (5.6%)  | 1 (2.0%) | -        |
| Synoviosarcoma                        | 8 (3.7%)  | 3 (1.9%)  | 4 (7.8%) | 1 (50%)  |
| PNET                                  | 22 (10%)  | 13 (8.0%) | 9 (18%)  | -        |
| Osteosarcoma                          | 18 (8.4%) | 12 (7.4%) | 5 (9.8%) | 1 (50%)  |
| Chondrosarcoma                        | 8 (3.7%)  | 7 (4.3%)  | 1 (2.0%) | -        |
| MFS                                   | 5 (2.3%)  | 4 (2.5%)  | 1 (2.0%) | -        |
| MPNST                                 | 4 (1.9%)  | 4 (2.5%)  | -        | -        |
| Angiosarcoma                          | 4 (1.9%)  | 3 (1.9%)  | 1 (2.0%) | -        |
| Phyllode tumor                        | 1 (0.5%)  | 1 (0.6%)  | -        | -        |
| Round cell sarcoma                    | 1 (0.5%)  | 1 (0.6%)  | -        | -        |
| Fusiform cell sarcoma                 | 5 (2.3%)  | 4 (2.5%)  | 1 (2.0%) | -        |
| Epithelioid sarcoma                   | 5 (2.3%)  | 4 (2.5%)  | 1 (2.0%) | -        |
| Clear cell Sarcoma                    | 2 (0.9%)  | 2 (1.2%)  | -        | -        |
| Alveolar soft part sarcoma            | 1 (0.5%)  | -         | 1 (2.0%) | -        |
| Fibrosarcoma                          | 2 (0.9%)  | 1 (0.6%)  | 1 (2.0%) | -        |
| Desmoplastic small round cell sarcoma | 1 (0.5%)  | -         | 1 (2.0%) | -        |
| Fibrosarcomatous DFSP                 | 1 (0.5%)  | 1 (0.6%)  | -        | -        |
| <b>Tissue type analyzed</b>           |           |           |          |          |
| Primary tumor                         | 105 (49%) | 80 (50%)  | 24 (47%) | 1 (50%)  |
| Metastasis                            | 109 (51%) | 81 (50%)  | 27 (53%) | 1 (50%)  |
| Unknown                               | 1         | 1         | -        | -        |
| <b>Primary location</b>               |           |           |          |          |
| Extremities                           | 75 (35%)  | 52 (32%)  | 22 (43%) | 1 (50%)  |
| Abdominal                             | 34 (16%)  | 23 (14%)  | 11 (22%) | -        |
| Retroperitoneal                       | 21 (9.8%) | 19 (12%)  | 2 (3.9%) | -        |
| Uterus                                | 33 (15%)  | 25 (16%)  | 8 (16%)  | -        |
| Head and Neck                         | 14 (6.5%) | 14 (8.7%) | -        | -        |
| Thorax                                | 37 (17%)  | 28 (17%)  | 8 (16%)  | 1 (50%)  |
| Unknown                               | 1         | 1         | -        | -        |
| <b>Size</b>                           |           |           |          |          |
| 0-50                                  | 45 (25%)  | 40 (29%)  | 5 (12%)  | -        |
| 50-100                                | 68 (38%)  | 48 (35%)  | 20 (48%) | -        |
| >100                                  | 66 (37%)  | 48 (35%)  | 17 (40%) | 1 (100%) |
| Unknown                               | 45 (25%)  | 40 (29%)  | 5 (12%)  | -        |
| <b>Surgeon</b>                        |           |           |          |          |

|                                                |           |          |          |          |
|------------------------------------------------|-----------|----------|----------|----------|
| No surgery                                     | 30 (15%)  | 8 (5.2%) | 22 (44%) | -        |
| Network                                        | 68 (33%)  | 51 (33%) | 17 (34%) | -        |
| Outside network                                | 107 (52%) | 95 (62%) | 11 (22%) | 1 (100%) |
| Unknown                                        | 10        | 8        | 1        | 1        |
| <b>Resection margins</b>                       |           |          |          |          |
| No surgery                                     | 30 (15%)  | 8 (5.5%) | 22 (46%) | -        |
| R0                                             | 91 (47%)  | 71 (49%) | 19 (40%) | 1 (100%) |
| R1                                             | 41 (21%)  | 37 (25%) | 4 (8.3%) | -        |
| R2                                             | 33 (17%)  | 30 (21%) | 3 (6.2%) | -        |
| Unknown                                        | 20        | 16       | 3        | 1        |
| <b>Perioperative radiotherapy</b>              |           |          |          |          |
| Yes                                            | 65 (30%)  | 64 (40%) | 1 (2.0%) | 0 (0%)   |
| Unknown                                        | 1         | -        | -        | 1        |
| <b>Timing of anthracyclines administration</b> |           |          |          |          |
| No anthracyclines                              | 18 (8.5%) | 17 (11%) | 1 (2.0%) | -        |
| Neoadjuvant                                    | 43 (20%)  | 41 (25%) | 2 (3.9%) | -        |
| Adjuvant                                       | 21 (9.9%) | 20 (12%) | -        | 1 (100%) |
| Metastatic                                     | 131 (62%) | 83 (52%) | 48 (94%) | -        |
| Unknown                                        | 2         | 1        | -        | 1        |

Description of continuous variables by: Median (interquartile range), MFS = Myxofibrosarcoma; MPNST = Malignant Peripheral Nerve Sheath Tumor; PNET = Primitive Neuro-Ectodermic Tumors (Ewing and Ewing-like).



Table S2. Distribution of molecular alterations by histotype.

|                                      | TP53                        |                          |                           | CDKN2A                      |                           |                          | RB1                         |                           |                          | PTEN                        |                           |                          | MDM2                        |                                | CDK4                        |                                |
|--------------------------------------|-----------------------------|--------------------------|---------------------------|-----------------------------|---------------------------|--------------------------|-----------------------------|---------------------------|--------------------------|-----------------------------|---------------------------|--------------------------|-----------------------------|--------------------------------|-----------------------------|--------------------------------|
|                                      | Wild Type<br><i>n</i> = 162 | Deletion<br><i>n</i> = 8 | Mutation<br><i>n</i> = 45 | Wild Type<br><i>n</i> = 198 | Deletion<br><i>n</i> = 16 | Mutation<br><i>n</i> = 1 | Wild Type<br><i>n</i> = 187 | Deletion<br><i>n</i> = 25 | Mutation<br><i>n</i> = 3 | Wild Type<br><i>n</i> = 203 | Deletion<br><i>n</i> = 10 | Mutation<br><i>n</i> = 2 | Wild Type<br><i>n</i> = 204 | Amplification<br><i>n</i> = 11 | Wild Type<br><i>n</i> = 203 | Amplification<br><i>n</i> = 12 |
| Leiomyosarcoma                       | 27 (17%)                    | 6 (75%)                  | 20 (44%)                  | 50 (25%)                    | 2 (12%)                   | 1 (100%)                 | 34 (18%)                    | 16 (64%)                  | 3 (100%)                 | 46 (23%)                    | 6 (60%)                   | 1 (50%)                  | 52 (25%)                    | 1 (9.1%)                       | 53 (26%)                    | -                              |
| Well-Differentiated Liposarcoma      | 2 (1.2%)                    | -                        | 2 (4.4%)                  | 4 (2.0%)                    | -                         | -                        | 4 (2.1%)                    | -                         | -                        | 4 (2.0%)                    | -                         | -                        | 2 (1.0%)                    | 2 (18%)                        | 2 (1.0%)                    | 2 (17%)                        |
| Dedifferentiated Liposarcoma         | 6 (3.7%)                    | -                        | 1 (2.2%)                  | 7 (3.5%)                    | -                         | -                        | 7 (3.7%)                    | -                         | -                        | 7 (3.4%)                    | -                         | -                        | 1 (0.5%)                    | 6 (55%)                        | 2 (1.0%)                    | 5 (42%)                        |
| Myxoid Round Cell Liposarcoma        | 4 (2.5%)                    | -                        | -                         | 4 (2.0%)                    | -                         | -                        | 4 (2.1%)                    | -                         | -                        | 3 (1.5%)                    | -                         | 1 (50%)                  | 4 (2.0%)                    | -                              | 4 (2.0%)                    | -                              |
| Pleomorphic Liposarcoma              | -                           | 1 (12%)                  | 1 (2.2%)                  | 2 (1.0%)                    | -                         | -                        | 1 (0.5%)                    | 1 (4.0%)                  | -                        | 2 (1.0%)                    | -                         | -                        | 2 (1.0%)                    | -                              | 2 (1.0%)                    | -                              |
| Undifferentiated Pleomorphic Sarcoma | 14 (8.6%)                   | 1 (12%)                  | 5 (11%)                   | 19 (9.6%)                   | 1 (6.2%)                  | -                        | 15 (8.0%)                   | 5 (20%)                   | -                        | 19 (9.4%)                   | 1 (10%)                   | -                        | 19 (9.3%)                   | 1 (9.1%)                       | 19 (9.4%)                   | 1 (8.3%)                       |
| Alveolar Rhabdomyosarcoma            | 12 (7.4%)                   | -                        | 1 (2.2%)                  | 13 (6.6%)                   | -                         | -                        | 13 (7.0%)                   | -                         | -                        | 13 (6.4%)                   | -                         | -                        | 13 (6.4%)                   | -                              | 12 (5.9%)                   | 1 (8.3%)                       |
| Embryonal Rhabdomyosarcoma           | 10 (6.2%)                   | -                        | 1 (2.2%)                  | 10 (5.1%)                   | 1 (6.2%)                  | -                        | 11 (5.9%)                   | -                         | -                        | 11 (5.4%)                   | -                         | -                        | 11 (5.4%)                   | -                              | 11 (5.4%)                   | -                              |
| Pleomorphic Rhabdomyosarcoma         | 3 (1.9%)                    | -                        | -                         | 3 (1.5%)                    | -                         | -                        | 3 (1.6%)                    | -                         | -                        | 3 (1.5%)                    | -                         | -                        | 3 (1.5%)                    | -                              | 3 (1.5%)                    | -                              |
| Endometrial Stromal Sarcoma          | 8 (4.9%)                    | -                        | 2 (4.4%)                  | 9 (4.5%)                    | 1 (6.2%)                  | -                        | 9 (4.8%)                    | 1 (4.0%)                  | -                        | 10 (4.9%)                   | -                         | -                        | 10 (4.9%)                   | -                              | 9 (4.4%)                    | 1 (8.3%)                       |
| Synovialosarcoma                     | 8 (4.9%)                    | -                        | -                         | 8 (4.0%)                    | -                         | -                        | 8 (4.3%)                    | -                         | -                        | 8 (3.9%)                    | -                         | -                        | 8 (3.9%)                    | -                              | 8 (3.9%)                    | -                              |
| PNET                                 | 16 (9.9%)                   | -                        | 6 (13%)                   | 20 (10%)                    | 2 (12%)                   | -                        | 22 (12%)                    | -                         | -                        | 22 (11%)                    | -                         | -                        | 22 (11%)                    | -                              | 22 (11%)                    | -                              |
| Osteosarcoma                         | 15 (9.3%)                   | -                        | 3 (6.7%)                  | 17 (8.6%)                   | 1 (6.2%)                  | -                        | 17 (9.1%)                   | 1 (4.0%)                  | -                        | 18 (8.9%)                   | -                         | -                        | 18 (8.8%)                   | -                              | 16 (7.9%)                   | 2 (17%)                        |
| Chondrosarcoma                       | 8 (4.9%)                    | -                        | -                         | 7 (3.5%)                    | 1 (6.2%)                  | -                        | 8 (4.3%)                    | -                         | -                        | 8 (3.9%)                    | -                         | -                        | 8 (3.9%)                    | -                              | 8 (3.9%)                    | -                              |
| MFS                                  | 5 (3.1%)                    | -                        | -                         | 5 (2.5%)                    | -                         | -                        | 5 (2.7%)                    | -                         | -                        | 5 (2.5%)                    | -                         | -                        | 5 (2.5%)                    | -                              | 5 (2.5%)                    | -                              |

|                                       |          |   |          |          |          |   |             |          |   |          |         |   |          |          |          |   |
|---------------------------------------|----------|---|----------|----------|----------|---|-------------|----------|---|----------|---------|---|----------|----------|----------|---|
| MPNST                                 | 3 (1.9%) | - | 1 (2.2%) | 1 (0.5%) | 3 (19%)  | - | 4<br>(2.1%) | -        | - | 4 (2.0%) | -       | - | 4 (2.0%) | -        | 4 (2.0%) | - |
| Angiosarcoma                          | 4 (2.5%) | - | -        | 4 (2.0%) | -        | - | 4<br>(2.1%) | -        | - | 4 (2.0%) | -       | - | 4 (2.0%) | -        | 4 (2.0%) | - |
| Phyllode tumor                        | 1 (0.6%) | - | -        | 1 (0.5%) | -        | - | 1<br>(0.5%) | -        | - | -        | 1 (10%) | - | 1 (0.5%) | -        | 1 (0.5%) | - |
| Round cell sarcoma                    | 1 (0.6%) | - | -        | -        | 1 (6.2%) | - | 1<br>(0.5%) | -        | - | 1 (0.5%) | -       | - | 1 (0.5%) | -        | 1 (0.5%) | - |
| Fusiform cell sarcoma                 | 4 (2.5%) | - | 1 (2.2%) | 2 (1.0%) | 3 (19%)  | - | 5<br>(2.7%) | -        | - | 4 (2.0%) | 1 (10%) | - | 4 (2.0%) | 1 (9.1%) | 5 (2.5%) | - |
| Epithelioid sarcoma                   | 4 (2.5%) | - | 1 (2.2%) | 5 (2.5%) | -        | - | 4<br>(2.1%) | 1 (4.0%) | - | 4 (2.0%) | 1 (10%) | - | 5 (2.5%) | -        | 5 (2.5%) | - |
| Clear cell Sarcoma                    | 2 (1.2%) | - | -        | 2 (1.0%) | -        | - | 2<br>(1.1%) | -        | - | 2 (1.0%) | -       | - | 2 (1.0%) | -        | 2 (1.0%) | - |
| Alveolar soft part sarcoma            | 1 (0.6%) | - | -        | 1 (0.5%) | -        | - | 1<br>(0.5%) | -        | - | 1 (0.5%) | -       | - | 1 (0.5%) | -        | 1 (0.5%) | - |
| Fibrosarcoma                          | 2 (1.2%) | - | -        | 2 (1.0%) | -        | - | 2<br>(1.1%) | -        | - | 2 (1.0%) | -       | - | 2 (1.0%) | -        | 2 (1.0%) | - |
| Desmoplastic small round cell sarcoma | 1 (0.6%) | - | -        | 1 (0.5%) | -        | - | 1<br>(0.5%) | -        | - | 1 (0.5%) | -       | - | 1 (0.5%) | -        | 1 (0.5%) | - |
| Fibrosarcomatous DFSP                 | 1 (0.6%) | - | -        | 1 (0.5%) | -        | - | 1<br>(0.5%) | -        | - | 1 (0.5%) | -       | - | 1 (0.5%) | -        | 1 (0.5%) | - |

**Table S3.** Disease-free survival in the TCGA cohort.

|                    | Number of Patients | Median Survival (months) | Cox Univariate HR (95%CI; <i>p</i> -Value) |
|--------------------|--------------------|--------------------------|--------------------------------------------|
| <b>Histology</b>   |                    |                          |                                            |
| LMS                | 69                 | 35                       | -                                          |
| DDLPS              | 25                 | 49                       | 0.79 (0.39–1.58; <i>p</i> = 0.50)          |
| UPS                | 28                 | -                        | 0.71 (0.35–1.42; <i>p</i> = 0.33)          |
| MFS                | 17                 | -                        | 0.69 (0.31–1.55; <i>p</i> = 0.37)          |
| MPNST              | 1                  | -                        | 0.00 (0.00–Inf; <i>p</i> = 1)              |
| <b>TP53 status</b> |                    |                          |                                            |
| Wild Type          | 77                 | 74                       | -                                          |
| Mutation           | 56                 | 26                       | <b>1.67 (1.01–2.76; <i>p</i> = 0.05)</b>   |
| Deletion           | 16                 | -                        | 1.10 (0.46–2.66; <i>p</i> = 0.82)          |

DFS = Disease-free survival; DDLPS = Dedifferentiated Liposarcoma; HR = Hazard ratio; LMS = Leiomyosarcoma; MFS = Myxofibrosarcoma; MPNST = Malignant Peripheral Nerve Sheath Tumor; TCGA = The Cancer Genome Atlas; UPS = Undifferentiated Pleomorphic Sarcoma.

**Table S4.** Response rate according to *TP53* status and anthracycline prescription.

|                                       | TP53 Status | <i>n</i> Patients Treated with Anthracyclines | <i>n</i> Patients with Response Data | ORR | OR (95%CI; <i>p</i> -Value)               |
|---------------------------------------|-------------|-----------------------------------------------|--------------------------------------|-----|-------------------------------------------|
| <b>Overall</b>                        |             |                                               |                                      |     |                                           |
|                                       | Wild-Type   | 146                                           | 125                                  | 35% | -                                         |
|                                       | Deletion    | 7                                             | 5                                    | 20% | 0.46 (0.02–3.23, <i>p</i> = 0.494)        |
|                                       | Mutation    | 42                                            | 31                                   | 55% | <b>2.24 (1.01–5.03, <i>p</i> = 0.048)</b> |
| <b>Neoadjuvant polychemotherapy</b>   |             |                                               |                                      |     |                                           |
|                                       | Wild-Type   | 28                                            | 27                                   | 44% | -                                         |
|                                       | Deletion    | 0                                             | 0                                    | -   | -                                         |
|                                       | Mutation    | 11                                            | 8                                    | 62% | 2.08 (0.42–11.88, <i>p</i> = 0.375)       |
| <b>Neoadjuvant monotherapy</b>        |             |                                               |                                      |     |                                           |
|                                       | Wild-Type   | 3                                             | 3                                    | 0   | -                                         |
|                                       | Deletion    | 0                                             | 0                                    | -   | -                                         |
|                                       | Mutation    | 1                                             | 1                                    | 0   | -                                         |
| <b>Metastatic polychemotherapy</b>    |             |                                               |                                      |     |                                           |
|                                       | Wild-Type   | 69                                            | 68                                   | 38% | -                                         |
|                                       | Deletion    | 4                                             | 2                                    | 50% | 1.62 (0.06–42.04, <i>p</i> = 0.738)       |
|                                       | Mutation    | 17                                            | 14                                   | 64% | 2.91 (0.90–10.36, <i>p</i> = 0.081)       |
| <b>Metastatic anthracycline alone</b> |             |                                               |                                      |     |                                           |
|                                       | Wild-Type   | 29                                            | 27                                   | 22% | -                                         |
|                                       | Deletion    | 3                                             | 3                                    | 0   | 0.00 (Inf–Inf, <i>p</i> = 0.99)           |
|                                       | Mutation    | 9                                             | 8                                    | 38% | 2.10 (0.35–11.46, <i>p</i> = 0.391)       |

OR = Odds Ratio; ORR = Overall response rate.

**Table S5.** Response rate according to *TP53* status and anthracycline prescription in STS.

|                                       | TP53 Status | <i>n</i> Patients with Response Data | ORR | OR (95%CI; <i>p</i> -Value)        |
|---------------------------------------|-------------|--------------------------------------|-----|------------------------------------|
| <b>Overall</b>                        |             |                                      |     |                                    |
|                                       | Wild-Type   | 95                                   | 34% | -                                  |
|                                       | Deletion    | 5                                    | 20% | 0.49 (0.02–3.50, <i>p</i> = 0.53)  |
|                                       | Mutation    | 25                                   | 52% | 2.13 (0.87–5.27, <i>p</i> = 0.10)  |
| <b>Neoadjuvant polychemotherapy</b>   |             |                                      |     |                                    |
|                                       | Wild-Type   | 17                                   | 59% | -                                  |
|                                       | Deletion    | 0                                    | 0   | -                                  |
|                                       | Mutation    | 5                                    | 60% | 1.05 (0.14–9.61, <i>p</i> = 0.96)  |
| <b>Metastatic polychemotherapy</b>    |             |                                      |     |                                    |
|                                       | Wild-Type   | 49                                   | 33% | -                                  |
|                                       | Deletion    | 2                                    | 50% | 2.06 (0.08–54.45, <i>p</i> = 0.62) |
|                                       | Mutation    | 11                                   | 64% | 3.61 (0.95–15.52, <i>p</i> = 0.07) |
| <b>Metastatic anthracycline alone</b> |             |                                      |     |                                    |
|                                       | Wild-Type   | 27                                   | 22% | -                                  |
|                                       | Deletion    | 3                                    | 0   | 0.00 (Inf-Inf, <i>p</i> = 0.99)    |
|                                       | Mutation    | 8                                    | 38% | 2.10 (0.35–11.46, <i>p</i> = 0.39) |

NA = Not Applicable; OR = Odds Ratio; ORR = Overall response rate; STS= Soft Tissue Sarcoma.

**Table S6.** Response rate according to *TP53* status and anthracycline prescription in LMS.

|                                       | TP53 status | <i>n</i> patients with re-sponse data | ORR  |
|---------------------------------------|-------------|---------------------------------------|------|
| <b>Overall</b>                        |             |                                       |      |
|                                       | Wild-Type   | 18                                    | 39%  |
|                                       | Deletion    | 3                                     | 30%  |
|                                       | Mutation    | 13                                    | 46%  |
| <b>Neoadjuvant polychemotherapy</b>   |             |                                       |      |
|                                       | Wild-Type   | 1                                     | 100% |
|                                       | Deletion    | 0                                     | 0    |
|                                       | Mutation    | 2                                     | 50%  |
| <b>Metastatic polychemotherapy</b>    |             |                                       |      |
|                                       | Wild-Type   | 8                                     | 25%  |
|                                       | Deletion    | 1                                     | 100% |
|                                       | Mutation    | 6                                     | 50%  |
| <b>Metastatic anthracycline alone</b> |             |                                       |      |
|                                       | Wild-Type   | 9                                     | 44%  |
|                                       | Deletion    | 2                                     | 0    |
|                                       | Mutation    | 5                                     | 40%  |

**Table S7.** Response rate according to *TP53* status and anthracycline prescription in UPS.

|                                       | TP53 status | <i>n</i> patients with re-sponse data | ORR  |
|---------------------------------------|-------------|---------------------------------------|------|
| <b>Overall</b>                        |             |                                       |      |
|                                       | Wild-Type   | 11                                    | 27%  |
|                                       | Deletion    | 1                                     | 0%   |
|                                       | Mutation    | 4                                     | 50%  |
| <b>Neoadjuvant polychemotherapy</b>   |             |                                       |      |
|                                       | Wild-Type   | 4                                     | 25%  |
|                                       | Deletion    | 0                                     | 0    |
|                                       | Mutation    | 1                                     | 100% |
| <b>Metastatic polychemotherapy</b>    |             |                                       |      |
|                                       | Wild-Type   | 3                                     | 67%  |
|                                       | Deletion    | 1                                     | 0%   |
|                                       | Mutation    | 1                                     | 100% |
| <b>Metastatic anthracycline alone</b> |             |                                       |      |

|           |   |    |
|-----------|---|----|
| Wild-Type | 3 | 0% |
| Deletion  | 0 | 0  |
| Mutation  | 1 | 0% |

**Table S8.** Response rate according to *TP53* status and anthracycline prescription in PNET.

|                                     | TP53 Status | <i>n</i> Patients with Response Data | ORR  |
|-------------------------------------|-------------|--------------------------------------|------|
| <b>Overall</b>                      |             |                                      |      |
|                                     | Wild-Type   | 15                                   | 73%  |
|                                     | Mutation    | 4                                    | 75%  |
| <b>Neoadjuvant polychemotherapy</b> |             |                                      |      |
|                                     | Wild-Type   | 6                                    | 33%  |
|                                     | Mutation    | 2                                    | 100% |
| <b>Metastatic polychemotherapy</b>  |             |                                      |      |
|                                     | Wild-Type   | 9                                    | 100% |
|                                     | Mutation    | 2                                    | 50%  |

## Supplementary Methods

**Table M1.** Comparison between MOSCATO and ProfiLER cohorts.

|                                      | Overall,<br><i>n</i> = 215 | ProfiLER, <i>n</i> = 144 | MOSCATO,<br><i>n</i> = 71 | <i>p</i> -Value  |
|--------------------------------------|----------------------------|--------------------------|---------------------------|------------------|
| <b>Age</b>                           |                            |                          |                           | <b>&lt;0.001</b> |
| ≤40                                  | 94 (44%)                   | 51 (35%)                 | 43 (61%)                  |                  |
| >40                                  | 121 (56%)                  | 93 (65%)                 | 28 (39%)                  |                  |
| <b>Gender</b>                        |                            |                          |                           | <b>0.6</b>       |
| Female                               | 112 (52%)                  | 77 (53%)                 | 35 (49%)                  |                  |
| Male                                 | 103 (48%)                  | 67 (47%)                 | 36 (51%)                  |                  |
| <b>Grade</b>                         |                            |                          |                           | <b>0.038</b>     |
| 1                                    | 24 (17%)                   | 18 (16%)                 | 6 (21%)                   |                  |
| 2                                    | 48 (33%)                   | 34 (29%)                 | 14 (50%)                  |                  |
| 3                                    | 72 (50%)                   | 64 (55%)                 | 8 (29%)                   |                  |
| Unknown                              | 71                         | 28                       | 43                        |                  |
| <b>Genomic</b>                       |                            |                          |                           | <b>0.4</b>       |
| Simple                               | 80 (37%)                   | 51 (35%)                 | 29 (41%)                  |                  |
| Complex                              | 135 (63%)                  | 93 (65%)                 | 42 (59%)                  |                  |
| <b>Histotyoe</b>                     |                            |                          |                           |                  |
| Leiomyosarcoma                       | 53 (25%)                   | 33 (23%)                 | 20 (28%)                  |                  |
| Well-Differentiated Liposarcoma      | 4 (1.9%)                   | 4 (2.8%)                 | -                         |                  |
| Dedifferentiated                     | 7 (3.3%)                   | 6 (4.2%)                 | 1 (1.4%)                  |                  |
| Myxoid Round Cell Liposarcoma        | 4 (1.9%)                   | 4 (2.8%)                 | -                         |                  |
| Pleomorphic Liposarcoma              | 2 (0.9%)                   | 2 (1.4%)                 | -                         |                  |
| Undifferentiated Pleomorphic Sarcoma | 20 (9.3%)                  | 18 (12%)                 | 2 (2.8%)                  |                  |
| Alveolar Rhabdomyosarcoma            | 13 (6.0%)                  | 7 (4.9%)                 | 6 (8.5%)                  |                  |
| Embryol Rhabdomyosarcoma             | 11 (5.1%)                  | 4 (2.8%)                 | 7 (9.9%)                  |                  |
| Pleomorphic Rhabdomyosarcoma         | 3 (1.4%)                   | -                        | 3 (4.2%)                  |                  |
| Endometrial Synovial Sarcoma         | 10 (4.7%)                  | 10 (6.9%)                | -                         |                  |
| Synovialosarcoma                     | 8 (3.7%)                   | 6 (4.2%)                 | 2 (2.8%)                  |                  |
| PNET                                 | 22 (10%)                   | 11 (7.6%)                | 11 (15%)                  |                  |
| Osteosarcoma                         | 18 (8.4%)                  | 13 (9.0%)                | 5 (7.0%)                  |                  |
| Chondrosarcoma                       | 8 (3.7%)                   | 5 (3.5%)                 | 3 (4.2%)                  |                  |
| MFS                                  | 5 (2.3%)                   | 4 (2.8%)                 | 1 (1.4%)                  |                  |
| MPNST                                | 4 (1.9%)                   | 4 (2.8%)                 | -                         |                  |
| Angiosarcoma                         | 4 (1.9%)                   | 3 (2.1%)                 | 1 (1.4%)                  |                  |

|                                              |           |           |          |       |
|----------------------------------------------|-----------|-----------|----------|-------|
| Phyllode tumor                               | 1 (0.5%)  | 1 (0.7%)  | -        |       |
| Round cell sarcoma                           | 1 (0.5%)  | 1 (0.7%)  | -        |       |
| Fusiform cell sarcoma                        | 5 (2.3%)  | 4 (2.8%)  | 1 (1.4%) |       |
| Epithelioid sarcoma                          | 5 (2.3%)  | 3 (2.1%)  | 2 (2.8%) |       |
| Clear cell Sarcoma                           | 2 (0.9%)  | -         | 2 (2.8%) |       |
| Alveolar soft part sarcoma                   | 1 (0.5%)  | -         | 1 (1.4%) |       |
| Fibrosarcoma                                 | 2 (0.9%)  | -         | 2 (2.8%) |       |
| Desmoplastic small round cell sarcoma        | 1 (0.5%)  | -         | 1 (1.4%) |       |
| Fibrosarcomatous DFSP                        | 1 (0.5%)  | 1 (0.7%)  | -        |       |
| <b>Stage at diagnosis</b>                    |           |           |          | 0.089 |
| Localized                                    | 162 (76%) | 113 (80%) | 49 (69%) |       |
| Metastatic                                   | 51 (24%)  | 29 (20%)  | 22 (31%) |       |
| Unknown                                      | 2         | 2         | 0        |       |
| <b>Primary</b>                               |           |           |          | 0.14  |
| Extremities                                  | 75 (35%)  | 50 (35%)  | 25 (35%) |       |
| Abdomil                                      | 34 (16%)  | 17 (12%)  | 17 (24%) |       |
| Retroperitoneal                              | 21 (9.8%) | 18 (13%)  | 3 (4.2%) |       |
| Uterus                                       | 33 (15%)  | 24 (17%)  | 9 (13%)  |       |
| Head and Neck                                | 14 (6.5%) | 9 (6.3%)  | 5 (7.0%) |       |
| Thorax                                       | 37 (17%)  | 25 (17%)  | 12 (17%) |       |
| Unknown                                      | 1         | 1         | 0        |       |
| <b>Size, mm</b>                              |           |           |          | 0.2   |
| 0–50                                         | 45 (25%)  | 32 (24%)  | 13 (27%) |       |
| 50–100                                       | 68 (38%)  | 46 (35%)  | 22 (46%) |       |
| >100                                         | 66 (37%)  | 53 (40%)  | 13 (27%) |       |
| Unknown                                      | 36        | 13        | 23       |       |
| <b>Surgeon</b>                               |           |           |          | 0.14  |
| Network                                      | 68 (33%)  | 42 (29%)  | 26 (42%) |       |
| Outside network                              | 107 (52%) | 81 (57%)  | 26 (42%) |       |
| No surgery                                   | 30 (15%)  | 20 (14%)  | 10 (16%) |       |
| Unknown                                      | 10        | 1         | 9        |       |
| <b>Resection margin</b>                      |           |           |          | 0.6   |
| R0                                           | 91 (47%)  | 67 (49%)  | 24 (42%) |       |
| R1                                           | 41 (21%)  | 26 (19%)  | 15 (26%) |       |
| R2                                           | 33 (17%)  | 25 (18%)  | 8 (14%)  |       |
| No surgery                                   | 30 (15%)  | 20 (14%)  | 10 (18%) |       |
| Unknown                                      | 20        | 6         | 14       |       |
| <b>Radiation of primary tumor</b>            | 65 (30%)  | 45 (31%)  | 20 (28%) | 0.6   |
| Unknown                                      | 1         | 1         | 0        |       |
| <b>Setting of anthracycline prescription</b> |           |           |          | 0.08  |
| Adjuvant                                     | 21 (9.9%) | 13 (9.2%) | 8 (11%)  |       |
| Metastatic                                   | 131 (62%) | 81 (57%)  | 50 (70%) |       |
| Neo-adjuvant                                 | 43 (20%)  | 32 (23%)  | 11 (15%) |       |
| No                                           | 18 (8.5%) | 16 (11%)  | 2 (2.8%) |       |
| Unknown                                      | 2         | 2         | 0        |       |
| <b>TP53</b>                                  |           |           |          | 0.8   |
| Wild Type                                    | 162 (75%) | 107 (74%) | 55 (77%) |       |
| Deletion                                     | 8 (3.7%)  | 5 (3.5%)  | 3 (4.2%) |       |
| Mutation                                     | 45 (21%)  | 32 (22%)  | 13 (18%) |       |
| <b>CDKN2A</b>                                |           |           |          | 0.4   |
| Wild Type                                    | 198 (92%) | 134 (93%) | 64 (90%) |       |
| Deletion                                     | 16 (7.4%) | 10 (6.9%) | 6 (8.5%) |       |
| Mutation                                     | 1 (0.5%)  | -         | 1 (1.4%) |       |
| <b>RB1</b>                                   |           |           |          | 0.073 |
| Wild Type                                    | 187 (87%) | 122 (85%) | 65 (92%) |       |
| Deletion                                     | 25 (12%)  | 21 (15%)  | 4 (5.6%) |       |
| Mutation                                     | 3 (1.4%)  | 1 (0.7%)  | 2 (2.8%) |       |

|               |           |           |          |      |
|---------------|-----------|-----------|----------|------|
| <b>PTEN</b>   |           |           |          | 0.7  |
| Wild Type     | 203 (94%) | 137 (95%) | 66 (93%) |      |
| Deletion      | 10 (4.7%) | 6 (4.2%)  | 4 (5.6%) |      |
| Mutation      | 2 (0.9%)  | 1 (0.7%)  | 1 (1.4%) |      |
| <b>CDK4</b>   |           |           |          | 0.3  |
| Wild Type     | 203 (94%) | 134 (93%) | 69 (97%) |      |
| Amplification | 12 (5.6%) | 10 (6.9%) | 2 (2.8%) |      |
| <b>MDM2</b>   |           |           |          | >0.9 |
| Wild Type     | 204 (95%) | 136 (94%) | 68 (96%) |      |
| Amplification | 11 (5.1%) | 8 (5.6%)  | 3 (4.2%) |      |

**Table M2.** Characteristics of the cohort in MOSCATO as per Table S1.

|                                       | Overall, <i>n</i> = 71 | Localized, <i>n</i> = 49 | Metastatic, <i>n</i> = 22 |
|---------------------------------------|------------------------|--------------------------|---------------------------|
| <b>Age</b>                            |                        |                          |                           |
| ≤40                                   | 43 (61%)               | 26 (53%)                 | 17 (77%)                  |
| >40                                   | 28 (39%)               | 23 (47%)                 | 5 (23%)                   |
| <b>Gender</b>                         |                        |                          |                           |
| Female                                | 35 (49%)               | 25 (51%)                 | 10 (45%)                  |
| Male                                  | 36 (51%)               | 24 (49%)                 | 12 (55%)                  |
| <b>Grade</b>                          |                        |                          |                           |
| 1                                     | 6 (21%)                | 6 (25%)                  | -                         |
| 2                                     | 14 (50%)               | 11 (46%)                 | 3 (75%)                   |
| 3                                     | 8 (29%)                | 7 (29%)                  | 1 (25%)                   |
| Unknown                               | 43                     | 25                       | 18                        |
| <b>Genomic</b>                        |                        |                          |                           |
| Simple                                | 29 (41%)               | 16 (33%)                 | 13 (59%)                  |
| Complex                               | 42 (59%)               | 33 (67%)                 | 9 (41%)                   |
| <b>Histotype</b>                      |                        |                          |                           |
| Leiomyosarcoma                        | 20 (28%)               | 18 (37%)                 | 2 (9.1%)                  |
| Dedifferentiated LPS                  | 1 (1.4%)               | 1 (2.0%)                 | -                         |
| Undifferentiated Pleomorphic Sarcoma  | 2 (2.8%)               | 1 (2.0%)                 | 1 (4.5%)                  |
| Alveolar Rhabdomyosarcoma             | 6 (8.5%)               | 1 (2.0%)                 | 5 (23%)                   |
| Embryol Rhabdomyosarcoma              | 7 (9.9%)               | 6 (12%)                  | 1 (4.5%)                  |
| Pleomorphic Rhabdomyosarcoma          | 3 (4.2%)               | 2 (4.1%)                 | 1 (4.5%)                  |
| Synovialosarcoma                      | 2 (2.8%)               | 1 (2.0%)                 | 1 (4.5%)                  |
| PNET                                  | 11 (15%)               | 7 (14%)                  | 4 (18%)                   |
| Osteosarcoma                          | 5 (7.0%)               | 2 (4.1%)                 | 3 (14%)                   |
| Chondrosarcoma                        | 3 (4.2%)               | 3 (6.1%)                 | -                         |
| MFS                                   | 1 (1.4%)               | 1 (2.0%)                 | -                         |
| Angiosarcoma                          | 1 (1.4%)               | -                        | 1 (4.5%)                  |
| Fusiform cell sarcoma                 | 1 (1.4%)               | 1 (2.0%)                 | -                         |
| Dermatofibrosarcoma protuberans       | -                      | -                        | -                         |
| Epithelioid sarcoma                   | 2 (2.8%)               | 2 (4.1%)                 | -                         |
| Clear cell Sarcoma                    | 2 (2.8%)               | 2 (4.1%)                 | -                         |
| Alveolar soft part sarcoma            | 1 (1.4%)               | -                        | 1 (4.5%)                  |
| Fibrosarcoma                          | 2 (2.8%)               | 1 (2.0%)                 | 1 (4.5%)                  |
| Desmoplastic small round cell sarcoma | 1 (1.4%)               | -                        | 1 (4.5%)                  |
| <b>Primary location</b>               |                        |                          |                           |
| Extremities                           | 25 (35%)               | 13 (27%)                 | 12 (55%)                  |
| Abdominal                             | 17 (24%)               | 12 (24%)                 | 5 (23%)                   |
| Retroperitoneal                       | 3 (4.2%)               | 3 (6.1%)                 | -                         |
| Uterus                                | 9 (13%)                | 7 (14%)                  | 2 (9.1%)                  |
| Head and Neck                         | 5 (7.0%)               | 5 (10%)                  | -                         |
| Thorax                                | 12 (17%)               | 9 (18%)                  | 3 (14%)                   |

|                                    |          |          |           |
|------------------------------------|----------|----------|-----------|
| <b>Size, mm</b>                    |          |          |           |
| 0–50                               | 13 (27%) | 9 (28%)  | 4 (25%)   |
| 50–100                             | 22 (46%) | 14 (44%) | 8 (50%)   |
| >100                               | 13 (27%) | 9 (28%)  | 4 (25%)   |
| Unknown                            | 23       | 17       | 6         |
| <b>Surgeon</b>                     |          |          |           |
| Network                            | 26 (42%) | 16 (39%) | 10 (48%)  |
| Outside network                    | 26 (42%) | 24 (59%) | 2 (9.5%)  |
| No surgery                         | 10 (16%) | 1 (2.4%) | 9 (43%)   |
| Unknown                            | 9        | 8        | 1         |
| <b>Resection margin</b>            |          |          |           |
| R0                                 | 24 (42%) | 16 (42%) | 8 (42%)   |
| R1                                 | 15 (26%) | 14 (37%) | 1 (5.3%)  |
| R2                                 | 8 (14%)  | 7 (18%)  | 1 (5.3%)  |
| No surgery                         | 10 (18%) | 1 (2.6%) | 9 (47%)   |
| Unknown                            | 14       | 11       | 3         |
| <b>Radiation of primary tumor</b>  | 20 (28%) | 20 (41%) | -         |
| <b>Anthracyclines prescription</b> |          |          |           |
| Adjuvant                           | 8 (11%)  | 8 (16%)  | -         |
| Metastatic                         | 50 (70%) | 28 (57%) | 22 (100%) |
| Neo-adjuvant                       | 11 (15%) | 11 (22%) | -         |
| No                                 | 2 (2.8%) | 2 (4.1%) | -         |

**Table M3.** Characteristics of the cohort in ProfILER as per Table S1.

|                                      | Overall, <i>n</i> = 142 | Localized, <i>n</i> = 113 | Metastatic, <i>n</i> = 29 |
|--------------------------------------|-------------------------|---------------------------|---------------------------|
| <b>Age</b>                           |                         |                           |                           |
| ≤40                                  | 50 (35%)                | 35 (31%)                  | 15 (52%)                  |
| >40                                  | 92 (65%)                | 78 (69%)                  | 14 (48%)                  |
| <b>Gender</b>                        |                         |                           |                           |
| Female                               | 76 (54%)                | 63 (56%)                  | 13 (45%)                  |
| Male                                 | 66 (46%)                | 50 (44%)                  | 16 (55%)                  |
| <b>Grade</b>                         |                         |                           |                           |
| 1                                    | 18 (16%)                | 16 (17%)                  | 2 (11%)                   |
| 2                                    | 34 (30%)                | 29 (30%)                  | 5 (26%)                   |
| 3                                    | 63 (55%)                | 51 (53%)                  | 12 (63%)                  |
| Unknown                              | 27                      | 17                        | 10                        |
| <b>Genomic</b>                       |                         |                           |                           |
| Simple                               | 50 (35%)                | 37 (33%)                  | 13 (45%)                  |
| Complex                              | 92 (65%)                | 76 (67%)                  | 16 (55%)                  |
| <b>Histotype</b>                     |                         |                           |                           |
| Leiomyosarcoma                       | 33 (23%)                | 28 (25%)                  | 5 (17%)                   |
| Well-Differentiated Liposarcoma      | 4 (2.8%)                | 3 (2.7%)                  | 1 (3.4%)                  |
| Dedifferentiated                     | 6 (4.2%)                | 6 (5.3%)                  | -                         |
| Myxoid Round Cell Liposarcoma        | 4 (2.8%)                | 3 (2.7%)                  | 1 (3.4%)                  |
| Pleomorphic Liposarcoma              | 2 (1.4%)                | 2 (1.8%)                  | -                         |
| Undifferentiated Pleomorphic Sarcoma | 18 (13%)                | 15 (13%)                  | 3 (10%)                   |
| Alveolar Rhabdomyosarcoma            | 7 (4.9%)                | 5 (4.4%)                  | 2 (6.9%)                  |
| Embryol Rhabdomyosarcoma             | 4 (2.8%)                | 2 (1.8%)                  | 2 (6.9%)                  |
| Pleomorphic Rhabdomyosarcoma         | -                       | -                         | -                         |
| Endometrial Synovial Sarcoma         | 10 (7.0%)               | 9 (8.0%)                  | 1 (3.4%)                  |
| Synoviosarcoma                       | 5 (3.5%)                | 2 (1.8%)                  | 3 (10%)                   |
| PNET                                 | 11 (7.7%)               | 6 (5.3%)                  | 5 (17%)                   |
| Osteosarcoma                         | 12 (8.5%)               | 10 (8.8%)                 | 2 (6.9%)                  |
| Chondrosarcoma                       | 5 (3.5%)                | 4 (3.5%)                  | 1 (3.4%)                  |
| MFS                                  | 4 (2.8%)                | 3 (2.7%)                  | 1 (3.4%)                  |



|                                       |           |           |          |
|---------------------------------------|-----------|-----------|----------|
| MPNST                                 | 4 (2.8%)  | 4 (3.5%)  | -        |
| Angiosarcoma                          | 3 (2.1%)  | 3 (2.7%)  | -        |
| Phyllode tumor                        | 1 (0.7%)  | 1 (0.9%)  | -        |
| Round cell sarcoma                    | 1 (0.7%)  | 1 (0.9%)  | -        |
| Histiocytic sarcoma                   | -         | -         | -        |
| Fusiform cell sarcoma                 | 4 (2.8%)  | 3 (2.7%)  | 1 (3.4%) |
| Epithelioid sarcoma                   | 3 (2.1%)  | 2 (1.8%)  | 1 (3.4%) |
| Clear cell Sarcoma                    | -         | -         | -        |
| Alveolar soft part sarcoma            | -         | -         | -        |
| Fibrosarcoma                          | -         | -         | -        |
| Desmoplastic small round cell sarcoma | -         | -         | -        |
| Fibrosarcomatous DFSP                 | 1 (0.7%)  | 1 (0.9%)  | -        |
| <b>Location</b>                       |           |           |          |
| Extremities                           | 49 (35%)  | 39 (35%)  | 10 (34%) |
| Abdominal                             | 17 (12%)  | 11 (9.8%) | 6 (21%)  |
| Retroperitoneal                       | 18 (13%)  | 16 (14%)  | 2 (6.9%) |
| Uterus                                | 24 (17%)  | 18 (16%)  | 6 (21%)  |
| Head and Neck                         | 9 (6.4%)  | 9 (8.0%)  | -        |
| Thorax                                | 24 (17%)  | 19 (17%)  | 5 (17%)  |
| Unknown                               | 1         | 1         | 0        |
| <b>Size</b>                           |           |           |          |
| 0–50                                  | 32 (25%)  | 31 (30%)  | 1 (3.8%) |
| 50–100                                | 46 (35%)  | 34 (33%)  | 12 (46%) |
| >100                                  | 52 (40%)  | 39 (38%)  | 13 (50%) |
| Unknown                               | 12        | 9         | 3        |
| <b>Surgeon</b>                        |           |           |          |
| Network                               | 42 (30%)  | 35 (31%)  | 7 (24%)  |
| Outside network                       | 80 (56%)  | 71 (63%)  | 9 (31%)  |
| No surgery                            | 20 (14%)  | 7 (6.2%)  | 13 (45%) |
| <b>Resection margin</b>               |           |           |          |
| R0                                    | 66 (48%)  | 55 (51%)  | 11 (38%) |
| R1                                    | 26 (19%)  | 23 (21%)  | 3 (10%)  |
| R2                                    | 25 (18%)  | 23 (21%)  | 2 (6.9%) |
| No surgery                            | 20 (15%)  | 7 (6.5%)  | 13 (45%) |
| Unknown                               | 5         | 5         | 0        |
| <b>Radiation of primary tumor</b>     | 45 (32%)  | 44 (39%)  | 1 (3.4%) |
| <b>Anthracyclines prescription</b>    |           |           |          |
| Adjuvant                              | 12 (8.5%) | 12 (11%)  | -        |
| Metastatic                            | 81 (57%)  | 55 (49%)  | 26 (90%) |
| Neo-adjuvant                          | 32 (23%)  | 30 (27%)  | 2 (6.9%) |
| No                                    | 16 (11%)  | 15 (13%)  | 1 (3.4%) |
| Unknown                               | 1         | 1         | 0        |

**Table M4.** Distribution of molecular alterations by histotype in MOSCATO cohort.

|                                       | TP53           |              |               | CDKN2A         |                        |              | RB1            |               |              | PTEN           |               |              | MDM2           |               | CDK4           |               |
|---------------------------------------|----------------|--------------|---------------|----------------|------------------------|--------------|----------------|---------------|--------------|----------------|---------------|--------------|----------------|---------------|----------------|---------------|
|                                       | Wild Type      | Deletion     | Mutation      | Wild Type      | Deletion               | Mutation     | Wild Type      | Deletion      | Mutation     | Wild Type      | Deletion      | Mutation     | Wild Type      | Amplification | Wild Type      | Amplification |
|                                       | <i>n</i> = 162 | <i>n</i> = 8 | <i>n</i> = 45 | <i>n</i> = 198 | Deletion <i>n</i> = 16 | <i>n</i> = 1 | <i>n</i> = 187 | <i>n</i> = 25 | <i>n</i> = 3 | <i>n</i> = 203 | <i>n</i> = 10 | <i>n</i> = 2 | <i>n</i> = 204 | <i>n</i> = 11 | <i>n</i> = 203 | <i>n</i> = 12 |
| Leiomyosarcoma                        | 9 (16%)        | 3 (100%)     | 8 (62%)       | 18 (28%)       | 1 (17%)                | 1 (100%)     | 14 (22%)       | 4 (100%)      | 2 (100%)     | 15 (23%)       | 4 (100%)      | 1 (100%)     | 19 (28%)       | 1 (33%)       | 20 (29%)       | -             |
| Well-Differentiated Liposarcoma       | -              | -            | -             | -              | -                      | -            | -              | -             | -            | -              | -             | -            | -              | -             | -              | -             |
| Dedifferentiated Liposarcoma          | 1 (1.8%)       | -            | -             | 1 (1.6%)       | -                      | -            | 1 (1.5%)       | -             | -            | 1 (1.5%)       | -             | -            | -              | 1 (33%)       | -              | 1 (50%)       |
| Myxoid Round Cell Liposarcoma         | -              | -            | -             | -              | -                      | -            | -              | -             | -            | -              | -             | -            | -              | -             | -              | -             |
| Pleomorphic Liposarcoma               | -              | -            | -             | -              | -                      | -            | -              | -             | -            | -              | -             | -            | -              | -             | -              | -             |
| Undifferentiated Pleomorphic Sarcoma  | 2 (3.6%)       | -            | -             | 1 (1.6%)       | 1 (17%)                | -            | 2 (3.1%)       | -             | -            | 2 (3.0%)       | -             | -            | 1 (1.5%)       | 1 (33%)       | 1 (1.4%)       | 1 (50%)       |
| Alveolar Rhabdomyosarcoma             | 5 (9.1%)       | -            | 1 (7.7%)      | 6 (9.4%)       | -                      | -            | 6 (9.2%)       | -             | -            | 6 (9.1%)       | -             | -            | 6 (8.8%)       | -             | 6 (8.7%)       | -             |
| Embryonal Rhabdomyosarcoma            | 7 (13%)        | -            | -             | 6 (9.4%)       | 1 (17%)                | -            | 7 (11%)        | -             | -            | 7 (11%)        | -             | -            | 7 (10%)        | -             | 7 (10%)        | -             |
| Pleomorphic Rhabdomyosarcoma          | 3 (5.5%)       | -            | -             | 3 (4.7%)       | -                      | -            | 3 (4.6%)       | -             | -            | 3 (4.5%)       | -             | -            | 3 (4.4%)       | -             | 3 (4.3%)       | -             |
| Endometrial Stromal Sarcoma           | -              | -            | -             | -              | -                      | -            | -              | -             | -            | -              | -             | -            | -              | -             | -              | -             |
| Synovialosarcoma                      | 2 (3.6%)       | -            | -             | 2 (3.1%)       | -                      | -            | 2 (3.1%)       | -             | -            | 2 (3.0%)       | -             | -            | 2 (2.9%)       | -             | 2 (2.9%)       | -             |
| PNET                                  | 7 (13%)        | -            | 4 (31%)       | 9 (14%)        | 2 (33%)                | -            | 11 (17%)       | -             | -            | 11 (17%)       | -             | -            | 11 (16%)       | -             | 11 (16%)       | -             |
| Osteosarcoma                          | 5 (9.1%)       | -            | -             | 5 (7.8%)       | -                      | -            | 5 (7.7%)       | -             | -            | 5 (7.6%)       | -             | -            | 5 (7.4%)       | -             | 5 (7.2%)       | -             |
| Chondrosarcoma                        | 3 (5.5%)       | -            | -             | 3 (4.7%)       | -                      | -            | 3 (4.6%)       | -             | -            | 3 (4.5%)       | -             | -            | 3 (4.4%)       | -             | 3 (4.3%)       | -             |
| MFS                                   | 1 (1.8%)       | -            | -             | 1 (1.6%)       | -                      | -            | 1 (1.5%)       | -             | -            | 1 (1.5%)       | -             | -            | 1 (1.5%)       | -             | 1 (1.4%)       | -             |
| MPNST                                 | -              | -            | -             | -              | -                      | -            | -              | -             | -            | -              | -             | -            | -              | -             | -              | -             |
| Angiosarcoma                          | 1 (1.8%)       | -            | -             | 1 (1.6%)       | -                      | -            | 1 (1.5%)       | -             | -            | 1 (1.5%)       | -             | -            | 1 (1.5%)       | -             | 1 (1.4%)       | -             |
| Phyllode tumor                        | -              | -            | -             | -              | -                      | -            | -              | -             | -            | -              | -             | -            | -              | -             | -              | -             |
| Round cell sarcoma                    | -              | -            | -             | -              | -                      | -            | -              | -             | -            | -              | -             | -            | -              | -             | -              | -             |
| Fusiform cell sarcoma                 | 1 (1.8%)       | -            | -             | -              | 1 (17%)                | -            | 1 (1.5%)       | -             | -            | 1 (1.5%)       | -             | -            | 1 (1.5%)       | -             | 1 (1.4%)       | -             |
| Epithelioid sarcoma                   | 2 (3.6%)       | -            | -             | 2 (3.1%)       | -                      | -            | 2 (3.1%)       | -             | -            | 2 (3.0%)       | -             | -            | 2 (2.9%)       | -             | 2 (2.9%)       | -             |
| Clear cell Sarcoma                    | 2 (3.6%)       | -            | -             | 2 (3.1%)       | -                      | -            | 2 (3.1%)       | -             | -            | 2 (3.0%)       | -             | -            | 2 (2.9%)       | -             | 2 (2.9%)       | -             |
| Alveolar soft part sarcoma            | 1 (1.8%)       | -            | -             | 1 (1.6%)       | -                      | -            | 1 (1.5%)       | -             | -            | 1 (1.5%)       | -             | -            | 1 (1.5%)       | -             | 1 (1.4%)       | -             |
| Fibrosarcoma                          | 2 (3.6%)       | -            | -             | 2 (3.1%)       | -                      | -            | 2 (3.1%)       | -             | -            | 2 (3.0%)       | -             | -            | 2 (2.9%)       | -             | 2 (2.9%)       | -             |
| Desmoplastic small round cell sarcoma | 1 (1.8%)       | -            | -             | 1 (1.6%)       | -                      | -            | 1 (1.5%)       | -             | -            | 1 (1.5%)       | -             | -            | 1 (1.5%)       | -             | 1 (1.4%)       | -             |
| Fibrosarcomatous DFSP                 | -              | -            | -             | -              | -                      | -            | -              | -             | -            | -              | -             | -            | -              | -             | -              | -             |

**Table M5.** Distribution of molecular alterations by histotype in ProfILER cohort.

|                                 | TP53           |              |               | CDKN2A         |                        |              | RB1            |               |              | PTEN           |               |              | MDM2           |               | CDK4           |               |
|---------------------------------|----------------|--------------|---------------|----------------|------------------------|--------------|----------------|---------------|--------------|----------------|---------------|--------------|----------------|---------------|----------------|---------------|
|                                 | Wild Type      | Deletion     | Mutation      | Wild Type      | Deletion               | Mutation     | Wild Type      | Deletion      | Mutation     | Wild Type      | Deletion      | Mutation     | Wild Type      | Amplification | Wild Type      | Amplification |
|                                 | <i>n</i> = 162 | <i>n</i> = 8 | <i>n</i> = 45 | <i>n</i> = 198 | Deletion <i>n</i> = 16 | <i>n</i> = 1 | <i>n</i> = 187 | <i>n</i> = 25 | <i>n</i> = 3 | <i>n</i> = 203 | <i>n</i> = 10 | <i>n</i> = 2 | <i>n</i> = 204 | <i>n</i> = 11 | <i>n</i> = 203 | <i>n</i> = 12 |
| Leiomyosarcoma                  | 18 (17%)       | 3 (60%)      | 12 (38%)      | 32 (24%)       | 1 (10%)                | 0 (NA%)      | 20 (16%)       | 12 (57%)      | 1 (100%)     | 31 (23%)       | 2 (33%)       | -            | 33 (24%)       | -             | 33 (25%)       | -             |
| Well-Differentiated Liposarcoma | 2 (1.9%)       | -            | 2 (6.2%)      | 4 (3.0%)       | -                      | 0 (NA%)      | 4 (3.3%)       | -             | -            | 4 (2.9%)       | -             | -            | 2 (1.5%)       | 2 (25%)       | 2 (1.5%)       | 2 (20%)       |

[illegible]

**Table M6.** TP53 status by grade in MOSCATO and ProfiLER studies.

|                     | Grade 1 | Grade 2  | Grade 3  | Pearson's Chi-square <i>p</i> -Value |
|---------------------|---------|----------|----------|--------------------------------------|
| <b>Whole cohort</b> |         |          |          | <b>0.05</b>                          |
| TP53 altered        | 4 (17%) | 10 (21%) | 27 (38%) |                                      |
| <b>ProfiLER</b>     |         |          |          | <b>0.017</b>                         |
| TP53 altered        | 2 (11%) | 6 (18%)  | 25 (39%) |                                      |
| <b>MOSCATO</b>      |         |          |          | <b>&gt;0.9</b>                       |
| TP53 altered        | 2 (33%) | 4 (29%)  | 2 (25%)  |                                      |

**Table M7.** Distribution of recurrences according to TP53 status in MOSCATO and ProfiLER.

|                     | Local    | Metastatic | Pearson's Chi-square <i>p</i> -value |
|---------------------|----------|------------|--------------------------------------|
| <b>Whole cohort</b> |          |            | <b>0.004</b>                         |
| TP53 altered        | 3 (7%)   | 38 (93%)   |                                      |
| TP53 Wild-Type      | 36 (30%) | 85 (70%)   |                                      |
| <b>ProfiLER</b>     |          |            | <b>0.006</b>                         |
| TP53 altered        | 1 (4%)   | 27 (96%)   |                                      |
| TP53 Wild-Type      | 24 (28%) | 61 (72%)   |                                      |
| <b>MOSCATO</b>      |          |            | <b>0.3</b>                           |
| TP53 altered        | 2 (15%)  | 11 (85%)   |                                      |
| TP53 Wild-Type      | 12 (33%) | 24 (67%)   |                                      |

**Table M8.** DFS in MOSCATO and ProfiLER.

|                 | Median DFS (months) | Lower 95%CI | Upper 95%CI | Log-Rank <i>p</i> -Value |
|-----------------|---------------------|-------------|-------------|--------------------------|
| <b>ProfiLER</b> | 14.56               | 11.76       | 19.74       | <b>0.12</b>              |
| <b>MOSCATO</b>  | 12.97               | 9.17        | 21.32       |                          |

**Table M9.** DFS analysis in MOSCATO cohort.

| Variable          | Number of patients | Median DFS (months) | Cox Univariate HR (95%CI; <i>p</i> -value) |
|-------------------|--------------------|---------------------|--------------------------------------------|
| <b>Gender</b>     |                    |                     |                                            |
| Female            | 25                 | 15 (9.9, 24)        | -                                          |
| Male              | 22                 | 10.0 (6.0, 28)      | 1.03 (0.56–1.87, <i>p</i> = 0.93)          |
| <b>Age</b>        |                    |                     |                                            |
| ≤40               | 25                 | 13 (8.1, 28)        | -                                          |
| >40               | 22                 | 12 (9.7, 21)        | 1.34 (0.74–2.44, <i>p</i> = 0.33)          |
| <b>Histotype</b>  |                    |                     |                                            |
| Leiomyosarcomas   | 18                 | 14 (10, 24)         | -                                          |
| Liposarcomas      | 1                  | 1.8 (-, -)          | 57.16 (3.30–990.96, <i>p</i> = 0.01)       |
| UPS               | 1                  | 8.2 (-, -)          | 2.91 (0.37–23.09, <i>p</i> = 0.31)         |
| Rhabdomyosarcomas | 9                  | 8.6 (5.8, -)        | 0.82 (0.34–1.99, <i>p</i> = 0.67)          |
| ESS               | 0                  | 2.5 (-, -)          | NA                                         |
| Synovial Sarcoma  | 1                  | 11 (8.1, -)         | 14.02 (1.41–139.32, <i>p</i> = 0.02)       |
| PNET              | 6                  | 20 (12, -)          | 1.36 (0.53–3.46, <i>p</i> = 0.52)          |
| Osteosarcomas     | 2                  | 26 (3.1, -)         | 0.84 (0.19–3.65, <i>p</i> = 0.82)          |
| Chondrosarcomas   | 2                  | 22 (5.6, -)         | 0.70 (0.16–3.12, <i>p</i> = 0.64)          |
| Other             | 7                  |                     | 0.58 (0.23–1.49, <i>p</i> = 0.26)          |

|                                      |    |               |                               |
|--------------------------------------|----|---------------|-------------------------------|
| <b>Grade</b>                         |    |               |                               |
| 1                                    | 5  | 22 (15, -)    | -                             |
| 2                                    | 11 | 10 (3.1, -)   | 1.12 (0.36–3.47, $p = 0.84$ ) |
| 3                                    | 7  | 13 (8.2, -)   | 1.93 (0.58–6.41, $p = 0.28$ ) |
| <b>Genomic profile</b>               |    |               |                               |
| Simple                               | 15 | 9.7 (5.6, 34) | -                             |
| Complex                              | 32 | 13 (9.9, 22)  | 0.93 (0.49–1.76, $p = 0.82$ ) |
| <b>Primary location</b>              |    |               |                               |
| Extremities                          | 12 | 17 (8.2, -)   | -                             |
| Abdominal                            | 11 | 21 (13, -)    | 0.92 (0.38–2.25, $p = 0.86$ ) |
| Retroperitoneal                      | 3  | 9.0 (1.8, -)  | 2.08 (0.56–7.68, $p = 0.27$ ) |
| Uterus                               | 7  | 13 (1.9, -)   | 1.74 (0.65–4.62, $p = 0.27$ ) |
| Head and Neck                        | 5  | 10 (8.6, -)   | 1.71 (0.58–5.10, $p = 0.33$ ) |
| Thorax                               | 9  | 6.0 (5.0, -)  | 2.48 (0.99–6.21, $p = 0.05$ ) |
| <b>Size, mm</b>                      |    |               |                               |
| 0–50                                 | 9  | 10 (5.6, -)   | -                             |
| 50–100                               | 14 | 20 (13, -)    | 0.54 (0.22–1.30, $p = 0.17$ ) |
| >100                                 | 8  | 7.8 (4.0, -)  | 0.77 (0.29–2.07, $p = 0.61$ ) |
| <b>Surgeon</b>                       |    |               |                               |
| Network                              | 15 | 9.2 (5.8, 28) | -                             |
| Outside network                      | 24 | 16 (9.9, 27)  | 0.94 (0.48–1.87, $p = 0.87$ ) |
| <b>Resection margin</b>              |    |               |                               |
| R0                                   | 16 | 12 (8.1, 41)  | -                             |
| R1                                   | 14 | 11 (6.0, 40)  | 1.14 (0.54–2.42, $p = 0.72$ ) |
| R2                                   | 7  | 20 (5.8, -)   | 0.73 (0.28–1.93, $p = 0.53$ ) |
| <b>Radiotherapy of primary tumor</b> |    |               |                               |
| No                                   | 28 | 17 (8.6, 28)  | -                             |
| Yes                                  | 19 | 9.9 (9.0, 21) | 1.53 (0.83–2.82, $p = 0.17$ ) |
| <b>Peri-operative anthracyclines</b> |    |               |                               |
| No                                   | 28 | 17 (9.9, 27)  | -                             |
| Yes                                  | 19 | 9.7 (8.2, 22) | 1.53 (0.82–2.86, $p = 0.18$ ) |
| <b>TP53</b>                          |    |               |                               |
| Wild Type                            | 34 | 12 (8.6, 22)  | -                             |
| Deletion                             | 3  | 20 (1.9, -)   | 1.00 (0.30–3.30, $p = 1.00$ ) |
| Mutation                             | 10 | 12 (9.2, -)   | 1.48 (0.71–3.11, $p = 0.30$ ) |

Table M10. DFS analysis in ProFiLER cohort.

| Variable          | Number of patients | Median DFS (months) | Cox Univariate HR (95%CI; $p$ -value) |
|-------------------|--------------------|---------------------|---------------------------------------|
| <b>Gender</b>     |                    |                     |                                       |
| Female            | 59                 | 16 (12, 20)         | -                                     |
| Male              | 43                 | 12 (8.8, 22)        | 1.14 (0.76–1.70, $p = 0.52$ )         |
| <b>Age</b>        |                    |                     |                                       |
| ≤40               | 28                 | 11 (7.8, 36)        | -                                     |
| >40               | 74                 | 16 (12, 20)         | 1.04 (0.66–1.63, $p = 0.87$ )         |
| <b>Histotype</b>  |                    |                     |                                       |
| Leiomyosarcomas   | 28                 | 17 (12, 37)         | -                                     |
| Liposarcomas      | 14                 | 10 (9.0, 59)        | 1.34 (0.70–2.56, $p = 0.38$ )         |
| UPS               | 13                 | 15 (7.4, -)         | 1.17 (0.59–2.29, $p = 0.66$ )         |
| Rhabdomyosarcomas | 3                  | 12 (0.79, -)        | 2.58 (0.77–8.64, $p = 0.13$ )         |
| ESS               | 8                  | 37 (16, -)          | 0.65 (0.29–1.45, $p = 0.29$ )         |
| Synovial Sarcoma  | 2                  | 59 (16, -)          | 0.59 (0.14–2.52, $p = 0.48$ )         |
| PNET              | 6                  | 18 (10, -)          | 0.64 (0.24–1.70, $p = 0.37$ )         |
| Osteosarcomas     | 8                  | 10 (7.9, -)         | 1.42 (0.65–3.14, $p = 0.38$ )         |
| Chondrosarcomas   | 3                  | 64 (0.23, -)        | 0.68 (0.20–2.27, $p = 0.53$ )         |

|                                      |    |               |                               |
|--------------------------------------|----|---------------|-------------------------------|
| Other                                | 17 | 9.9 (8.0, 29) | 1.44 (0.78–2.66, $p = 0.24$ ) |
| <b>Grade</b>                         |    |               |                               |
| 1                                    | 14 | 49 (18, -)    | -                             |
| 2                                    | 27 | 20 (9.0, 33)  | 2.09 (1.06–4.14, $p = 0.03$ ) |
| 3                                    | 48 | 11 (9.8, 17)  | 2.11 (1.13–3.94, $p = 0.02$ ) |
| <b>Genomic profile</b>               |    |               |                               |
| Simple                               | 33 | 16 (10, 43)   | -                             |
| Complex                              | 69 | 14 (10, 20)   | 1.21 (0.79–1.85, $p = 0.38$ ) |
| <b>Primary location</b>              |    |               |                               |
| Extremities                          | 36 | 11 (8.8, 32)  | -                             |
| Abdominal                            | 10 | 15 (9.9, -)   | 1.40 (0.68–2.87, $p = 0.36$ ) |
| Retroperitoneal                      | 16 | 14 (9.5, 33)  | 1.33 (0.73–2.42, $p = 0.36$ ) |
| Uterus                               | 17 | 18 (15, 77)   | 0.70 (0.39–1.25, $p = 0.23$ ) |
| Head and Neck                        | 6  | 11 (1.7, -)   | 1.05 (0.44–2.51, $p = 0.92$ ) |
| Thorax                               | 16 | 17 (6.6, 43)  | 0.93 (0.51–1.70, $p = 0.81$ ) |
| <b>Size, mm</b>                      |    |               |                               |
| 0–50                                 | 27 | 13 (9.9, 22)  | -                             |
| 50–100                               | 31 | 18 (12, 39)   | 1.11 (0.65–1.89, $p = 0.71$ ) |
| >100                                 | 37 | 11 (9.0, 37)  | 1.19 (0.71–1.99, $p = 0.51$ ) |
| <b>Surgeon</b>                       |    |               |                               |
| Network                              | 35 | 15 (9.8, 25)  | -                             |
| Outside network                      | 67 | 14 (11, 20)   | 0.87 (0.57–1.31, $p = 0.49$ ) |
| <b>Resection margin</b>              |    |               |                               |
| R0                                   | 55 | 17 (14, 32)   | -                             |
| R1                                   | 23 | 12 (9.9, 39)  | 1.48 (0.90–2.44, $p = 0.12$ ) |
| R2                                   | 20 | 9.4 (4.6, 29) | 1.99 (1.18–3.37, $p = 0.01$ ) |
| <b>Radiotherapy of primary tumor</b> |    |               |                               |
| No                                   | 62 | 13 (9.8, 18)  | -                             |
| Yes                                  | 40 | 18 (12, 32)   | 0.83 (0.56–1.25, $p = 0.38$ ) |
| <b>Peri-operative anthracyclines</b> |    |               |                               |
| No                                   | 61 | 15 (10, 25)   | -                             |
| Yes                                  | 40 | 14 (10, 20)   | 1.11 (0.74–1.67, $p = 0.61$ ) |
| <b>TP53</b>                          |    |               |                               |
| Wild Type                            | 75 | 18 (13, 29)   | -                             |
| Deletion                             | 5  | 9.8 (6.6, -)  | 2.11 (0.84–5.29, $p = 0.11$ ) |
| Mutation                             | 22 | 9.9 (7.8, 16) | 1.86 (1.14–3.03, $p = 0.01$ ) |

**Table M11.** DFS in leiomyosarcoma cohort according to *TP53* status.

|                      | Median DFS (months) | 95%CI       | Log-Rank $p$ -value |
|----------------------|---------------------|-------------|---------------------|
| <b>MOSCATO</b>       |                     |             | 0.82                |
| <i>TP53</i> WT       | 14.22               | 11.99–NA    |                     |
| <i>TP53</i> Deletion | 20.46               | 1.93–NA     |                     |
| <i>TP53</i> Mutation | 12.97               | 9.85–NA     |                     |
| <b>ProfiLER</b>      |                     |             | 0.0018              |
| <i>TP53</i> WT       | 33.01               | 17.64–60.90 |                     |
| <i>TP53</i> Deletion | 9.75                | 6.43–NA     |                     |
| <i>TP53</i> Mutation | 8.65                | 7.35–NA     |                     |

NA = Not Applicable.

**Table M12.** Response rate according to *TP53* status and anthracycline prescription in MOSCATO cohort.

| TP53 Status | <i>n</i> Patients Treated with | <i>n</i> Patients with | ORR | OR (95%CI; $p$ -Value) |
|-------------|--------------------------------|------------------------|-----|------------------------|
|-------------|--------------------------------|------------------------|-----|------------------------|

|                                           |           | Anthracy-<br>Clines |    | Response<br>Data |                                 |  |
|-------------------------------------------|-----------|---------------------|----|------------------|---------------------------------|--|
| <b>Overall</b>                            |           |                     |    |                  |                                 |  |
|                                           | Wild-Type | 53                  | 45 | 47%              | -                               |  |
|                                           | Deletion  | 3                   | 1  | 100%             | Inf (0.0–NA, $p = 0.99$ )       |  |
|                                           | Mutation  | 13                  | 9  | 78%              | 4.00 (0.86–28.87, $p = 0.105$ ) |  |
| <b>Neoadjuvant polychemo-<br/>therapy</b> |           |                     |    |                  |                                 |  |
|                                           | Wild-Type | 9                   | 9  | 56%              | -                               |  |
|                                           | Deletion  | 0                   | 0  | -                | -                               |  |
|                                           | Mutation  | 2                   | 2  | 100%             | Inf (0.0–NA, $p = 0.99$ )       |  |
| <b>Metastatic polychemother-<br/>apy</b>  |           |                     |    |                  |                                 |  |
|                                           | Wild-Type | 30                  | 30 | 34%              | -                               |  |
|                                           | Deletion  | 3                   | 1  | 0%               | Inf (0.0–NA, $p = 0.99$ )       |  |
|                                           | Mutation  | 8                   | 6  | 62%              | 2.62 (0.44–21.04, $p = 0.307$ ) |  |
| <b>Metastatic anthracycline<br/>alone</b> |           |                     |    |                  |                                 |  |
|                                           | Wild-Type | 7                   | 6  | 14%              | -                               |  |
|                                           | Deletion  | 0                   | 0  | 0                | -                               |  |
|                                           | Mutation  | 2                   | 1  | 29%              | Inf (0.0–NA, $p = 0.99$ )       |  |

NA = Not Applicable; OR = Odds Ratio; ORR = Overall response rate.

**Table M13.** Response rate according to *TP53* status and anthracycline prescription in ProfiLER cohort.

|                                           |           | TP53 Status | <i>n</i> Patients<br>Treated with<br>Anthracy-<br>Clines | <i>n</i> Patients<br>with Re-<br>sponse Data | ORR | OR (95%CI; $p$ -Value)          |
|-------------------------------------------|-----------|-------------|----------------------------------------------------------|----------------------------------------------|-----|---------------------------------|
| <b>Overall</b>                            |           |             |                                                          |                                              |     |                                 |
|                                           | Wild-Type |             | 93                                                       | 80                                           | 29% | -                               |
|                                           | Deletion  |             | 4                                                        | 4                                            | 20% | 0 (0.0–Inf, $p = 0.99$ )        |
|                                           | Mutation  |             | 29                                                       | 22                                           | 45% | 2.07 (0.77–5.47, $p = 0.14$ )   |
| <b>Neoadjuvant polychemo-<br/>therapy</b> |           |             |                                                          |                                              |     |                                 |
|                                           | Wild-Type |             | 19                                                       | 18                                           | 39% | -                               |
|                                           | Deletion  |             | 0                                                        | 0                                            | -   | -                               |
|                                           | Mutation  |             | 9                                                        | 6                                            | 50% | 1.57 (0.23–10.79, $p = 0.634$ ) |
| <b>Neoadjuvant monotherapy</b>            |           |             |                                                          |                                              |     |                                 |
|                                           | Wild-Type |             | 3                                                        | 3                                            | 0   | -                               |
|                                           | Deletion  |             | 0                                                        | 0                                            | -   | -                               |
|                                           | Mutation  |             | 1                                                        | 1                                            | 0   | -                               |
| <b>Metastatic polychemother-<br/>apy</b>  |           |             |                                                          |                                              |     |                                 |
|                                           | Wild-Type |             | 39                                                       | 38                                           | 34% | -                               |
|                                           | Deletion  |             | 1                                                        | 1                                            | 0%  | 0 (0.0–Inf, $p = 0.99$ )        |
|                                           | Mutation  |             | 9                                                        | 8                                            | 62% | 3.21 (0.68–17.70, $p = 0.15$ )  |
| <b>Metastatic anthracycline<br/>alone</b> |           |             |                                                          |                                              |     |                                 |
|                                           | Wild-Type |             | 22                                                       | 21                                           | 14% | -                               |
|                                           | Deletion  |             | 3                                                        | 3                                            | 0   | 0 (0.0–Inf, $p = 0.99$ )        |

Mutation 7 7 29% 2.40 (0.26–18.95,  $p = 0.401$ )

OR = Odds Ratio; ORR = Overall response rate.

**Table M14.** Response rate according to *TP53* status and anthracycline prescription in STS in MOS-CATO cohort.

|                                       | TP53 Status | <i>n</i> Patients with Response Data | ORR |
|---------------------------------------|-------------|--------------------------------------|-----|
| <b>Overall</b>                        |             |                                      |     |
|                                       | Wild-Type   | 13                                   | 38% |
|                                       | Deletion    | 0                                    | -   |
|                                       | Mutation    | 2                                    | 50% |
| <b>Neoadjuvant polychemotherapy</b>   |             |                                      |     |
|                                       | Wild-Type   | 2                                    | 0%  |
|                                       | Deletion    | 0                                    | 0   |
|                                       | Mutation    | 0                                    | 0   |
| <b>Metastatic polychemotherapy</b>    |             |                                      |     |
|                                       | Wild-Type   | 7                                    | 43% |
|                                       | Deletion    | 0                                    | -   |
|                                       | Mutation    | 2                                    | 50% |
| <b>Metastatic anthracycline alone</b> |             |                                      |     |
|                                       | Wild-Type   | 4                                    | 50% |
|                                       | Deletion    | 0                                    | 0   |
|                                       | Mutation    | 0                                    | 0   |

OR = Odds Ratio; ORR = Overall response rate.

**Table M15.** Response rate according to *TP53* status and anthracycline prescription in STS in Pro-fILER cohort.

|                                       | TP53 Status | <i>n</i> Patients with Response Data | ORR | OR (95%CI; $p$ -Value)          |
|---------------------------------------|-------------|--------------------------------------|-----|---------------------------------|
| <b>Overall</b>                        |             |                                      |     |                                 |
|                                       | Wild-Type   | 82                                   | 33% | -                               |
|                                       | Deletion    | 5                                    | 20% | 0.51 (0.03–3.65, $p = 0.55$ )   |
|                                       | Mutation    | 23                                   | 52% | 2.22 (0.87–5.77, $p = 0.096$ )  |
| <b>Neoadjuvant polychemotherapy</b>   |             |                                      |     |                                 |
|                                       | Wild-Type   | 15                                   | 67% | -                               |
|                                       | Deletion    | 0                                    | 0   | -                               |
|                                       | Mutation    | 5                                    | 60% | 0.75 (0.09–7.12, $p = 0.787$ )  |
| <b>Metastatic polychemotherapy</b>    |             |                                      |     |                                 |
|                                       | Wild-Type   | 42                                   | 31% | -                               |
|                                       | Deletion    | 2                                    | 50% | 2.23 (0.08–59.41, $p = 0.581$ ) |
|                                       | Mutation    | 9                                    | 67% | 4.46 (1.02–23.85, $p = 0.056$ ) |
| <b>Metastatic anthracycline alone</b> |             |                                      |     |                                 |
|                                       | Wild-Type   | 23                                   | 17% | -                               |
|                                       | Deletion    | 3                                    | 0   | 0.00 (Inf-Inf, $p = 0.99$ )     |
|                                       | Mutation    | 8                                    | 38% | 2.85 (0.44–17.75, $p = 0.252$ ) |

NA = Not Applicable; OR = Odds Ratio; ORR = Overall response rate; STS= Soft Tissue Sarcoma.
